# Supplementary material for: New VVO2, VVO, VVOVVO and electrogenerated VIVOVVO systems of valproic acid hydrazones: a study of catalytic activity
Source: Royal Society of Chemistry journal article supplement (doi:10.1039/d4dt02030h), 2025-01-01
Supplement: d4dt02030h1.pdf [file d4dt02030h1.pdf]

***Electronic Supplementary Information***

**New  $V^V O_2$ ,  $V^V O$ ,  $V^V O V^V O$  and electrogenerated  $V^{IV} O V^V O$  systems of valproic acid hydrazones : Study of catalytic activity**

Roumi Patra<sup>a</sup>, Debopam Sinha<sup>a,b</sup>, Sandip Mondal<sup>c</sup>, Kajal Krishna Rajak<sup>\*a</sup>

<sup>a</sup>*Inorganic Chemistry Section, Department of Chemistry, Jadavpur University, Kolkata, 700032, India. E-mail: [kajalrajak@gmail.com](mailto:kajalrajak@gmail.com)*

<sup>b</sup>*Department of Chemistry, Vijaygarh Jyotish Ray College, Kolkata, 700032, India*

<sup>c</sup>*Department of Chemistry, Darjeeling Govt. College, Darjeeling, 734101, India.*

| <b>Table of Contents</b>                                                                                                             | <b>Page No.</b> |
|--------------------------------------------------------------------------------------------------------------------------------------|-----------------|
| Crystallographic data for ligand <b>H<sub>2</sub>L<sup>1</sup></b> and <b>H<sub>2</sub>L<sup>2</sup></b> and Complexes <b>1, 3</b> , | S3              |
| Selected bond lengths (Å) and bond angles (°) for <b>H<sub>2</sub>L<sup>1</sup></b>                                                  | S3              |
| Selected bond lengths (Å) and bond angles (°) for <b>H<sub>2</sub>L<sup>2</sup></b> , Complex <b>1</b>                               | S4              |
| Selected bond lengths (Å) and bond angles (°) for complex <b>3</b>                                                                   | S4              |
| Crystal structure image of Complex <b>2</b> and Complex <b>6</b>                                                                     | S5              |
| Supramolecular architecture of ligand <b>H<sub>2</sub>L<sup>1</sup></b> and complex <b>1, 3</b>                                      | S5-S6           |
| Absorption parameters and of the ligand and the complexes                                                                            | S6              |
| Absorption spectra of all the ligands in CH <sub>2</sub> Cl <sub>2</sub> at 298K                                                     | S6              |
| Absorption spectra of all the Complexes in CH <sub>2</sub> Cl <sub>2</sub> at 298K                                                   | S7              |
| Absorption parameters and of the complexes                                                                                           | S7              |
| X-band EPR spectra of <b>5a</b> & <b>6a</b> at RT and EPR spectral parameter                                                         | S8              |
| Cyclic voltammogram of (a) complex 1 and (b) complex 2 at different scan rates.                                                      | S8              |
| Isodensity plot of selected frontier orbitals of mononuclear complexes <b>2, 4</b> and <b>6</b>                                      | S9              |
| X-band EPR Spectral parameter of complex <b>1</b> and <b>2</b>                                                                       | S9              |
| Electronic spectral change during pyrogallol to purpurogallin conversion for complex <b>2</b> and <b>4</b>                           | S10- S11        |
| Electronic spectral change during 3,5-DTBC to 3,5-DTBQ conversion for complex <b>3</b>                                               | S12             |
| X band EPR spectra of the reaction intermediate <b>III (3<sub>cat</sub>)</b>                                                         | S12             |
| Electronic spectral change during 3,5-DTBC to 3,5-DTBQ conversion for complex <b>1</b>                                               | S13             |
| Kinetic Data for Catecholase-like Activity of Different Mono- and Dinuclear vanadium a Complexes.                                    | S13             |
| Mass spectra monitoring of reaction mixture of complex <b>4, 2</b> with 3,5-DTBC                                                     | S14             |
| Mass spectra monitoring of reaction mixture of complex <b>1, 3</b> with pyrogallol                                                   | S15             |
| Kinetic Data for Catecholase-like systems, for e.g. 3- Methoxycatechol, 3-Methyl catechol, pyrocatechol of Complex <b>3</b> .        | S16-S17         |
| X band EPR spectra of the reaction intermediate for substrates 3- Methoxycatechol, 3-Methyl catechol, pyrocatechol                   | S17             |
| Mass spectra monitoring of reaction mixture of complex <b>3, 2</b> with 3- Methoxycatechol, 3-Methyl catechol, pyrocatechol          | S18-S19         |
| <sup>1</sup> H and <sup>13</sup> C NMR spectra of ligand <b>H<sub>2</sub>L<sup>1-2</sup></b> and complex <b>1 - 6</b>                | S20-S27         |
| <sup>51</sup> V NMR spectra of complex <b>4</b> before and after addition of 3,5-DTBC                                                | S28             |
| Computational simulation details                                                                                                     | S29-S53         |

**Table S1** Crystallographic data for ligands  $H_2L^{1-2}$  complexes **1, 3**.

|                       | $H_2L^1$                              | $H_2L^2$                              | <b>Complex 1</b>                      | <b>Complex 3</b>                      |
|-----------------------|---------------------------------------|---------------------------------------|---------------------------------------|---------------------------------------|
| Empirical formula     | $C_{15}H_{22}N_2O_2$                  | $C_{19}H_{24}N_2O_2$                  | $C_{15}H_{21}N_2O_4V$                 | $C_{17}H_{27}N_2O_5V$                 |
| Formula weight        | 262.35                                | 312.40                                | 344.28                                | 390.35                                |
| Temperature /K        | 293                                   | 293                                   | 293                                   | 293                                   |
| Space group           | P21/c                                 | P21 21 21                             | P21/n                                 | P21/c                                 |
| a/Å                   | 9.0199(16)                            | 4.9108(7)                             | 9.7598(12)                            | 12.966(3)                             |
| b/Å                   | 19.834(3)                             | 11.4224(14)                           | 13.8657(17)                           | 16.279(3)                             |
| c/Å                   | 9.7259(15)                            | 30.400(4)                             | 13.1083(14)                           | 10.330(2)                             |
| $\alpha/^\circ$       | 90                                    | 90                                    | 90                                    | 90                                    |
| $\beta/^\circ$        | 115.716(5)                            | 90                                    | 111.86(01)                            | 112.488(5)                            |
| $\gamma/^\circ$       | 90                                    | 90                                    | 90                                    | 90                                    |
| Volume/Å <sup>3</sup> | 1567.7(4)                             | 1705.2(4)                             | 1646.4(3)                             | 2014.6(7)                             |
| Z                     | 4                                     | 4                                     | 4                                     | 4                                     |
| $\rho_{calc}/cm^3$    | 1.112                                 | 1.217                                 | 1.389                                 | 1.287                                 |
| $\mu/mm^{-1}$         | 0.074                                 | 0.079                                 | 0.621                                 | 0.519                                 |
| F(000)                | 568                                   | 672                                   | 720.0                                 | 824                                   |
| Radiation             | MoK $\alpha$<br>( $\lambda=0.71073$ ) |
| GOF                   | 1.029                                 | 1.094                                 | 1.051                                 | 1.05                                  |
| $R_1$                 | 0.0523                                | 0.0483                                | 0.0416                                | 0.0720                                |
| w $R_2$               | 0.1469                                | 0.1373                                | 0.1002                                | 0.1837                                |

**Table S2** Selected bond lengths (Å) and bond angles ( $^\circ$ ) for  $H_2L^1$ 

| $H_2L^1$        |     |           |                         |     |      |            |             |
|-----------------|-----|-----------|-------------------------|-----|------|------------|-------------|
| Bond Length (Å) |     |           | Bond Angle ( $^\circ$ ) |     |      |            |             |
| O1              | -C1 | 1.346(2)  | O1                      | -C1 | -C2  | 122.40(15) |             |
| O2              | -C4 | 1.220(17) | O1                      | -C1 | -C15 | 117.90(17) |             |
| N1              | -N2 | 1.372(17) | O2                      | -C4 | -C5  | 122.83(14) |             |
| N1              | -C3 | 1.274(18) | O2                      | -C4 | -N2  | 121.90(15) |             |
| N2              | -C4 | 1.347(18) | N1                      | -N2 | -C4  | 119.95(12) |             |
|                 |     |           | N2                      | -N1 | -C3  | 117.49(12) |             |
|                 |     |           | C2                      | -C3 | -N1  | -N2        | -176.25(13) |
|                 |     |           | C3                      | -N1 | -N2  | -C4        | 177.43(14)  |
|                 |     |           | O2                      | -C4 | -N2  | -N1        | 2.9(4)      |

**Table S3.** Selected bond lengths (Å) and bond angles (°) for H<sub>2</sub>L<sup>2</sup>

| H <sub>2</sub> L <sup>1</sup> |          |                  |           |
|-------------------------------|----------|------------------|-----------|
| Bond Length (Å)               |          | Bond Angle (°)   |           |
| O1 -C7                        | 1.353(4) | C10 -N1 -N2      | 118.0(3)  |
| O2 -C6                        | 1.225(5) | C6 -N2- N1       | 118.3(3)  |
| N1 -N2                        | 1.379(4) | N2 -C6 -O2       | 122.1(3)  |
| N1 -C10                       | 1.295(4) | C9 -C6 -O2       | 121.9(4)  |
| N2 -C6                        | 1.346(5) | O2 -C6 -N2- N1   | -7.2(4)   |
|                               |          | N1 -N2 -C6 -C9   | 171.4(3)  |
|                               |          | O1 -C7 -C19 -C4  | -175.8(3) |
|                               |          | O1 -C7- C20 -C12 | 176.2(3)  |

**Table S4.** Selected bond lengths (Å) and bond angles (°) for complex 1

| Complex 1       |            |            |                |  |  |
|-----------------|------------|------------|----------------|--|--|
| Bond Length (Å) |            |            | Bond Angle (°) |  |  |
| V1 -O1          | 1.8932(16) | O1 -V1 -O2 | 153.10(6)      |  |  |
| V1 -O2          | 2.0392(16) | O1 -V1 -O3 | 103.08(8)      |  |  |
| V1 -O3          | 1.6318(15) | O1 -V1 -O4 | 98.95(9)       |  |  |
| V1 -O4          | 1.6069(17) | O1 -V1 -N1 | 80.90(6)       |  |  |
| V1 -N1          | 2.1664(16) | O2 -V1 -O3 | 96.24(8)       |  |  |
| O1 -C1          | 1.319(3)   | O2 -V1 -O4 | 92.17(8)       |  |  |
| O2 -C4          | 1.260(2)   | O2 -V1 -N1 | 73.36(6)       |  |  |
| N1 -N2          | 1.389(3)   | O3 -V1 -O4 | 108.91(8)      |  |  |
| N1 -C3          | 1.299(3)   | O3 -V1 -N1 | 119.05(7)      |  |  |
| N2 -C4          | 1.322(3)   | O4 -V1 -N1 | 130.85(8)      |  |  |

**Table S5.** Selected bond lengths (Å) and bond angles (°) for complex 3

| Complex 3       |          |            |                |  |  |
|-----------------|----------|------------|----------------|--|--|
| Bond Length (Å) |          |            | Bond Angle (°) |  |  |
| V1 -O1          | 1.853(4) | O1 -V1 -O2 | 152.4(2)       |  |  |
| V1 -O2          | 1.945(4) | O1 -V1 -O3 | 100.0(2)       |  |  |
| V1 -O3          | 1.590(7) | O1 -V1 -O4 | 100.44(19)     |  |  |
| V1 -O4          | 1.766(5) | O1 -V1 -O5 | 81.73(18)      |  |  |
| V1 -O5          | 2.352(5) | O1 -V1 -N1 | 83.8(2)        |  |  |
| V1 -N1          | 2.121(6) | O2 -V1 -O3 | 98.9(2)        |  |  |
| O1 -C1          | 1.326(8) | O2 -V1 -O4 | 95.0(2)        |  |  |
| O2 -C4          | 1.288(9) | O2 -V1 -O5 | 77.87(18)      |  |  |
| N1 -N2          | 1.373(7) | O2 -V1 -N1 | 74.2(2)        |  |  |
| N1 -C3          | 1.271(8) | O3 -V1 -O4 | 102.1(2)       |  |  |
| N2 -C4          | 1.295(9) | O3 -V1 -O5 | 174.9(2)       |  |  |
|                 |          | O3 -V1 -N1 | 96.4(2)        |  |  |
|                 |          | O4 -V1 -O5 | 81.73(18)      |  |  |
|                 |          | O4 -V1 -N1 | 159.9(3)       |  |  |
|                 |          | O5 -V1 -N1 | 79.2(2)        |  |  |

The

quality of crystal data

of complex 2 and complex 6 were not crystallographically publishable. We give here it only to visualize the bond connectivity.

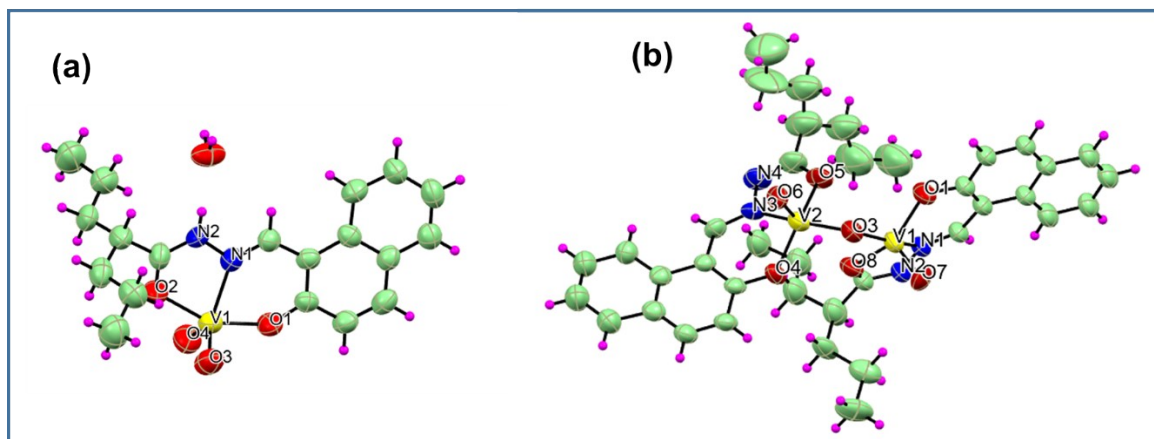

**Figure S1.** Crystal structure image of a) complex 2 b) complex 6

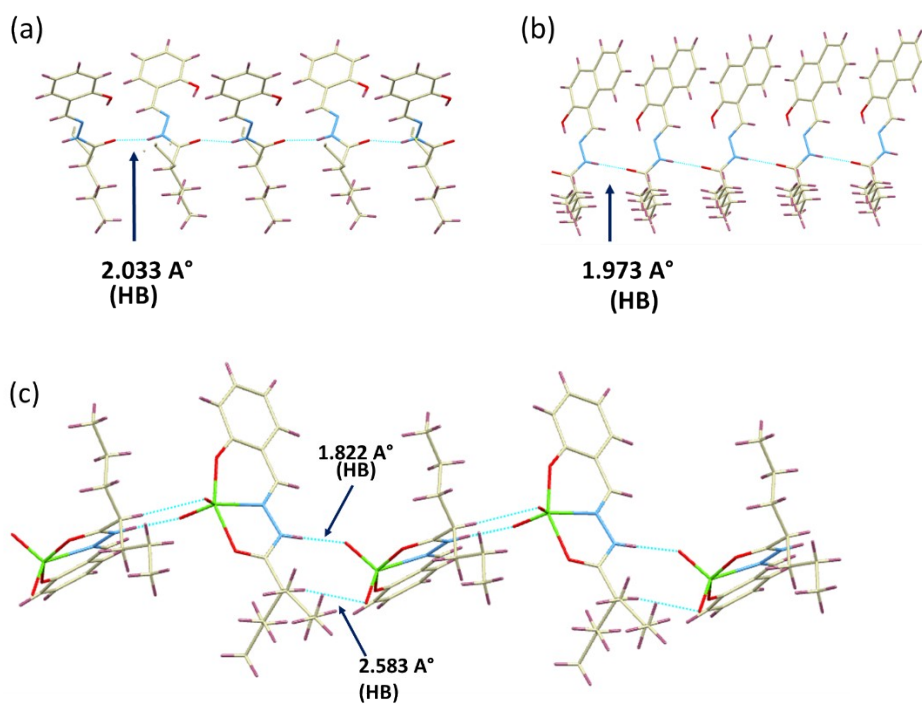

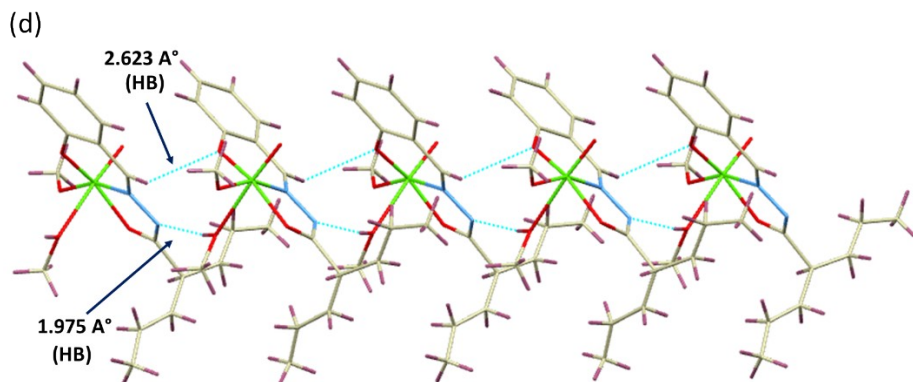

**Figure S2.** Supramolecular architecture of the complexes (a) **HL<sup>1</sup>, 1**, (b) **HL<sup>2</sup>, 2**, (c) **1**, (d).**3**

**Table S6.** Absorption parameters of the ligands

| Ligands                           | $\lambda_{\max}(\text{nm})[\epsilon(\text{M}^{-1}\text{cm}^{-1})]$ |
|-----------------------------------|--------------------------------------------------------------------|
| <b>H<sub>2</sub>L<sup>1</sup></b> | 280 (38700), 290 (37000), 322 (18900)                              |
| <b>H<sub>2</sub>L<sup>2</sup></b> | 308 (17800), 321 (24500), 356 (19000), 368 (17700)                 |

**Table S7.** Absorption parameters of the complexes

| Complexes | $\lambda_{\max}(\text{nm})[\epsilon(\text{M}^{-1}\text{cm}^{-1})]$ |
|-----------|--------------------------------------------------------------------|
| <b>1</b>  | 281 (45500), 320 (26800), 380 (7500)                               |
| <b>2</b>  | 293 (35000), 336 (19500), 412 (6700)                               |
| <b>3</b>  | 282 (42000), 320 (22450), 382 (7350)                               |
| <b>4</b>  | 295 (31750), 333 (19700), 411 (6850)                               |
| <b>5</b>  | 282 (51000), 321 (16100), 384 (4600)                               |
| <b>6</b>  | 295 (48500), 339 (14400), 414 (8150)                               |

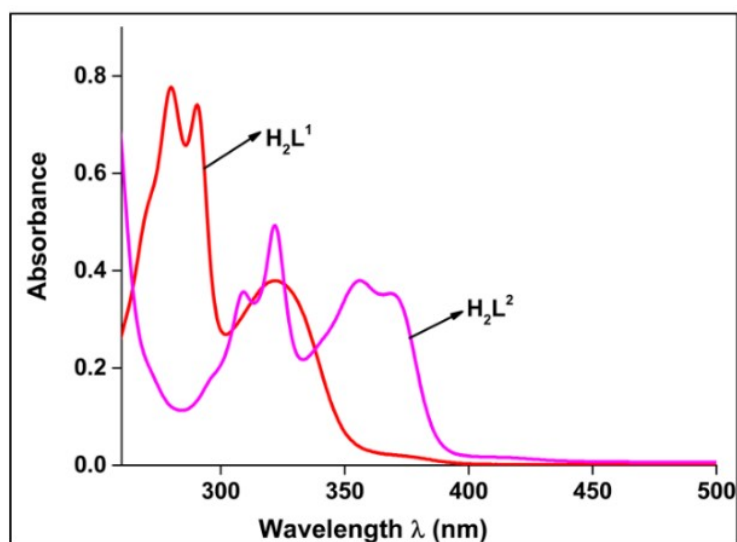

**Figure S3.** Absorption spectra of ligands in  $CH_2Cl_2$  at room temperature

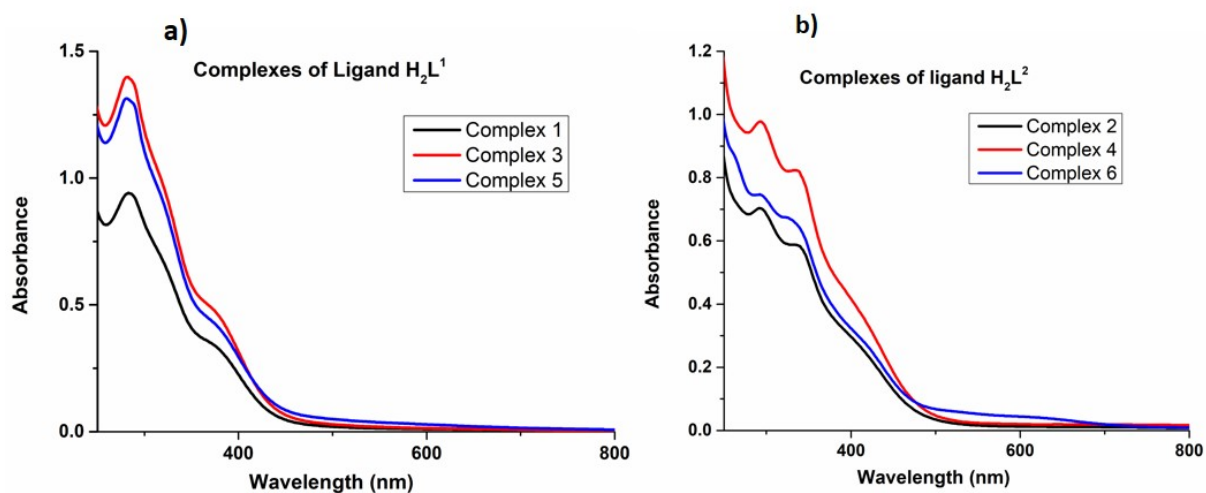

**Figure S4.** Absorption spectra for a) complexes of  $H_2L^1$  and b) complexes of  $H_2L^2$  in  $CH_2Cl_2$  at room temperature.

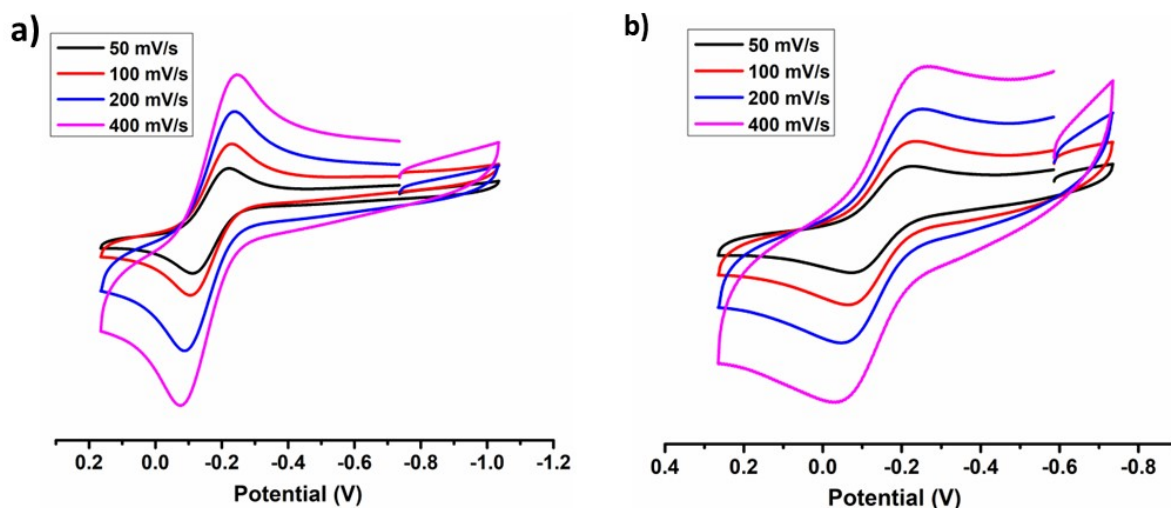

**Figure S5** Cyclic voltammogram of (a) complex 1 and (b) complex 2 at different scan rates.

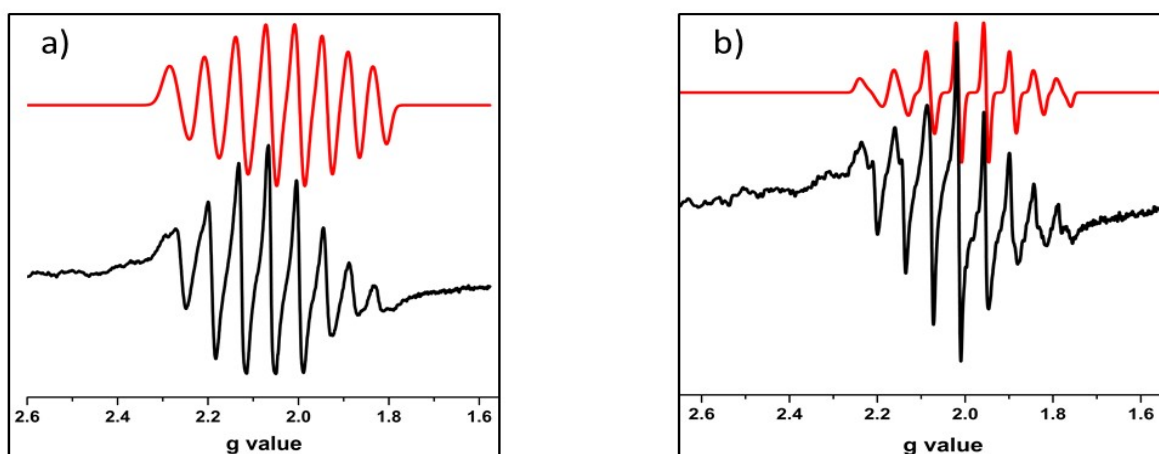

**Figure S6.** X-band EPR spectra of (a) **5a**, (b) **6a** at RT (black-experimental; red-simulated)

**Table S8.** X-band EPR Spectral parameter of complexes **5a** and **6a**.

| Complex   | Matrix                                     | g       | A (G)  | Iw (mT) |
|-----------|--------------------------------------------|---------|--------|---------|
| <b>5a</b> | CH <sub>2</sub> Cl <sub>2</sub> ,<br>300 K | 1.96775 | 284.98 | 3.8     |
| <b>6a</b> | CH <sub>2</sub> Cl <sub>2</sub> ,<br>300 K | 1.9678  | 294.40 | 2.0     |



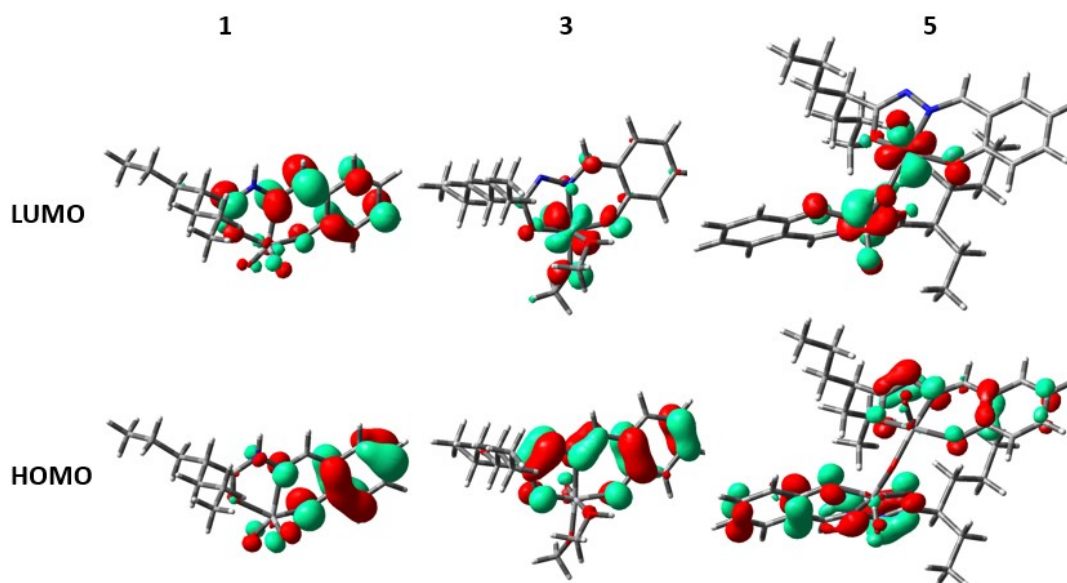

**Figure S7** Isodensity plot of selected frontier orbitals of complexes 1,3 and 5

**Table S9** X-band EPR Spectral parameter of complex 1<sup>-</sup> and 2<sup>-</sup>

| Complex        | Matrix                                     | $g_{\parallel}$ | $g_{\perp}$ | $g_{av}$ | $A_{\parallel}$ (G) | $A_{\perp}$ (G) | $A_{av}$ (G) | $lw$ (mT) |
|----------------|--------------------------------------------|-----------------|-------------|----------|---------------------|-----------------|--------------|-----------|
| 1 <sup>-</sup> | CH <sub>2</sub> Cl <sub>2</sub> ,<br>300 K | 1.9525          | 1.9643      | 1.9564   | 262.05              | 204.73          | 223.84       | 1.6       |
| 2 <sup>-</sup> | CH <sub>2</sub> Cl <sub>2</sub> ,<br>300 K | 1.9338          | 1.9646      | 1.9492   | 280.00              | 235.647         | 257.82       | 1.6       |

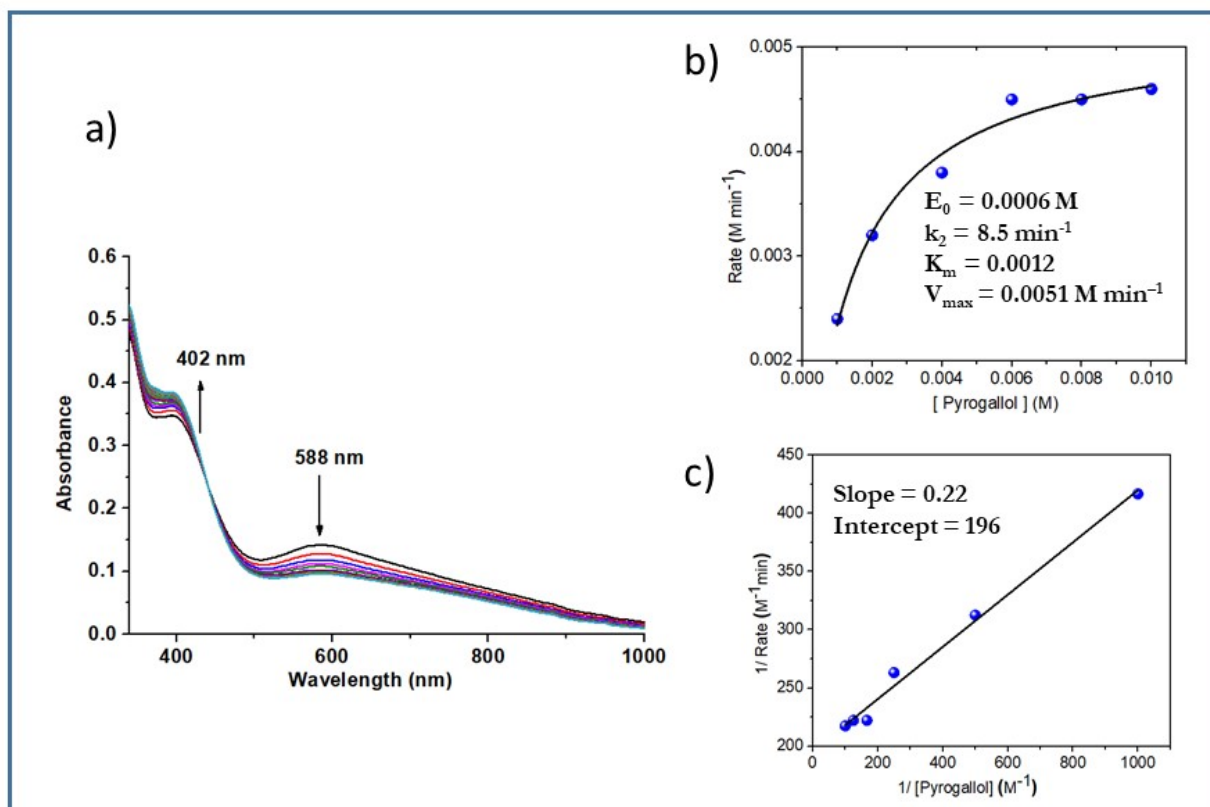

**Figure S8** (a) Absorption spectra of a solution containing  $6 \times 10^{-4} \text{ M}$  of complex **2** and  $0.006 \text{ M}$  of Pyrogallol, recorded at the interval of 5 min in methanol. (b) Plot of rate versus concentration of Pyrogallol for the oxidation reaction catalyzed by complex **2**. (c) Lineweaver–Burk plot.

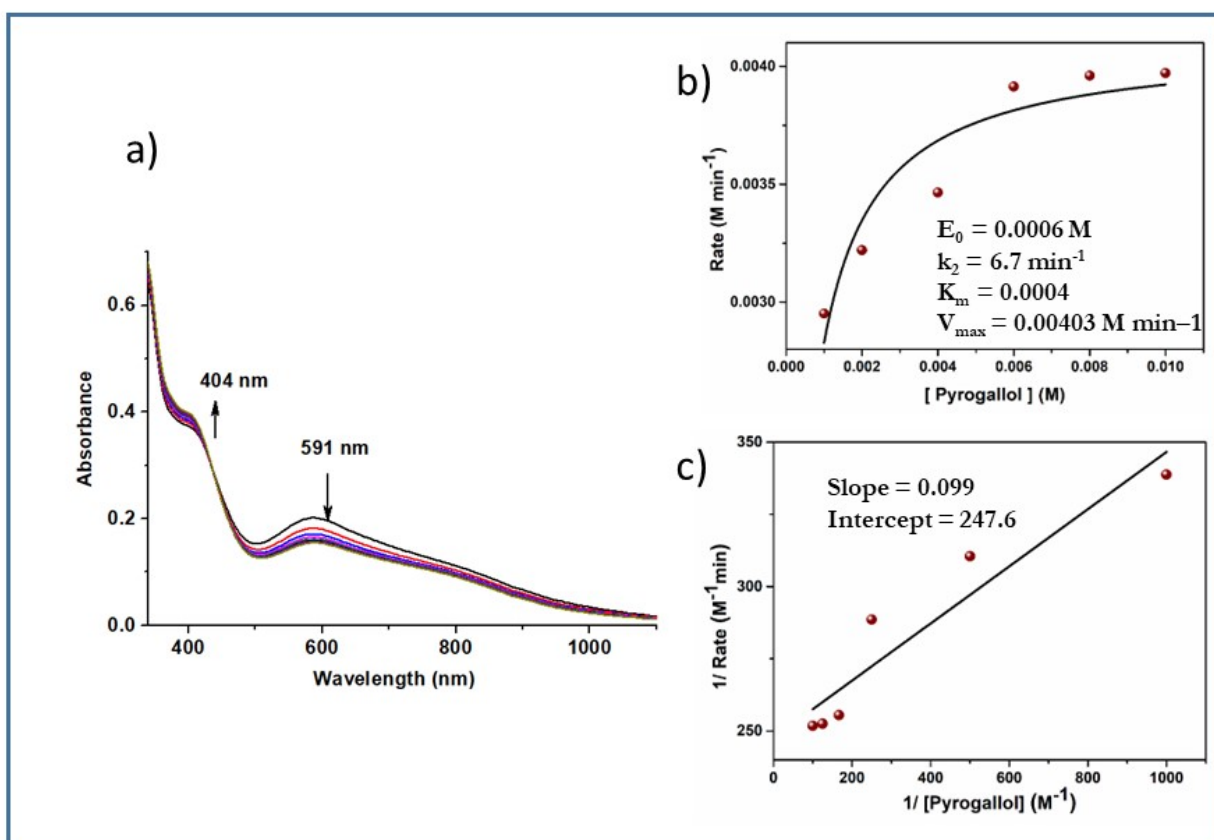

**Figure S9** (a) Absorption spectra of a solution containing  $6 \times 10^{-4} \text{ M}$  of complex 4 and 0.006 M of Pyrogallol at the interval of 5 min in methanol. (b) Plot of rate versus concentration of Pyrogallol for the oxidation reaction catalyzed by complex 4. (c) Lineweaver-Burk plot.

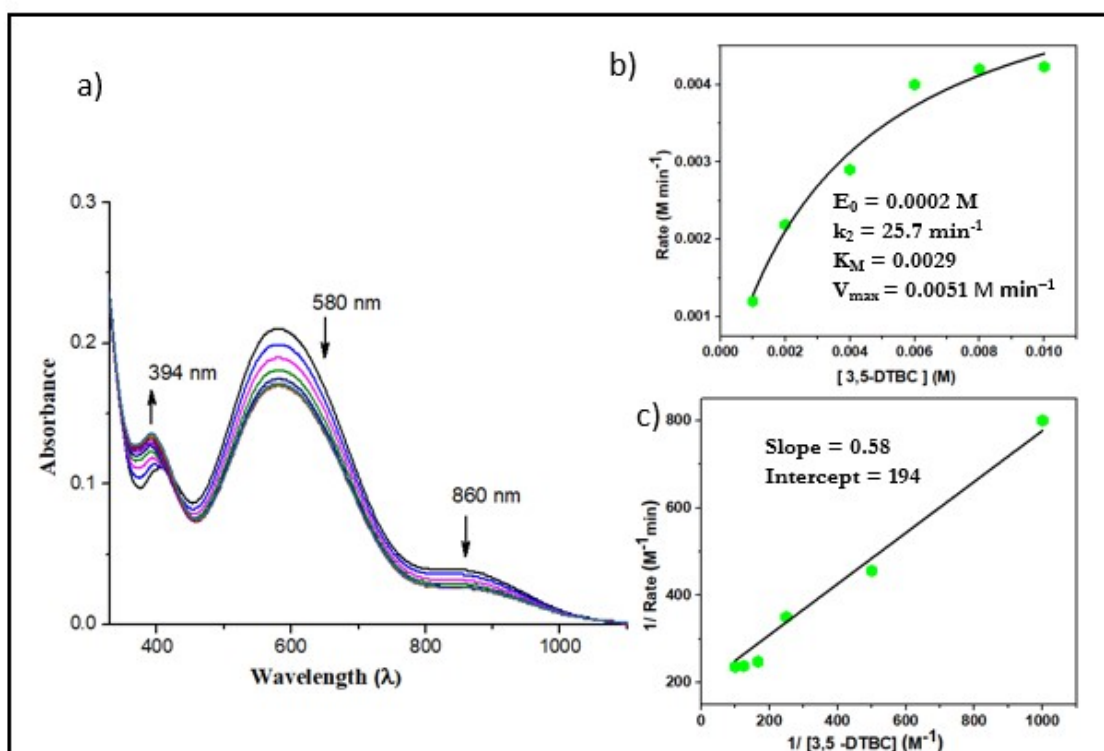

**Figure S10** (a) Absorption spectra of a solution containing  $2 \times 10^{-4}$  M of complex **3** and 0.004 M of 3,5-DTBC, recorded at the interval of 5 min in methanol. (b) Plot of rate versus concentration of 3, 5-DTBC for the oxidation reaction catalysed by complex**3**. (c) Lineweaver–Burk plot.

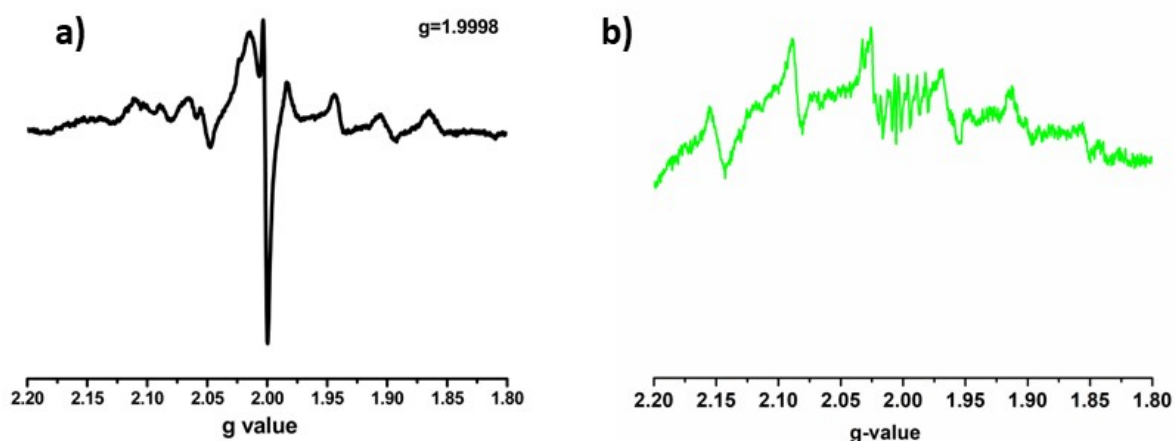

**Figure S11.** X-band EPR spectra of the reaction of 3, 5- DTBC with complex **3** a) intermediate **III** ( $3_{cat}$ ) b)  $3_{cat}$  with TEMPO for complex **3**.

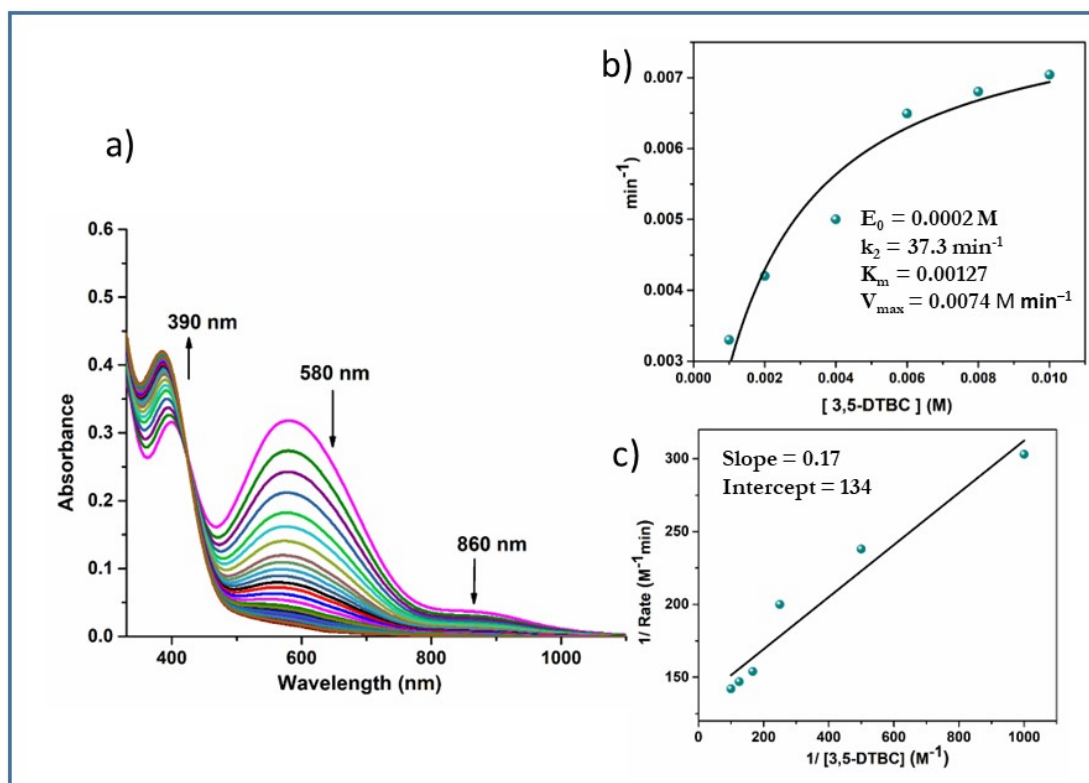

**Figure S12**(a) Absorption spectra of a solution containing  $2 \times 10^{-4}$  M of complex **1** and 0.004 M of 3,5-DTBC in presence of one drop portion of  $\text{H}_2\text{O}_2$  ( $10^{-2}$  M) recorded at the interval of 5 min in methanol. (b) Plot of rate versus concentration of 3, 5-DTBC for the oxidation reaction catalysed by complex **3**. (c) Lineweaver–Burk plot.

**Table S10** Kinetic Data for Catecholase-like Activity of Different Mono- and Dinuclear vanadium a Complexes

| Catalyst                                       | Solvent | $k_{\text{cat}}$                   | Ref |
|------------------------------------------------|---------|------------------------------------|-----|
| Mononuclear V(V)                               | MeOH    | $2.063 \times 10^3 \text{ h}^{-1}$ | 18b |
| Dinuclear V(V) breaks down to Mononuclear V(V) | MeOH    | $1.737 \times 10^3 \text{ h}^{-1}$ | 18c |
| Oxovanadium(V)                                 | MeOH    | $3.24 \text{ h}^{-1}$              | 21b |

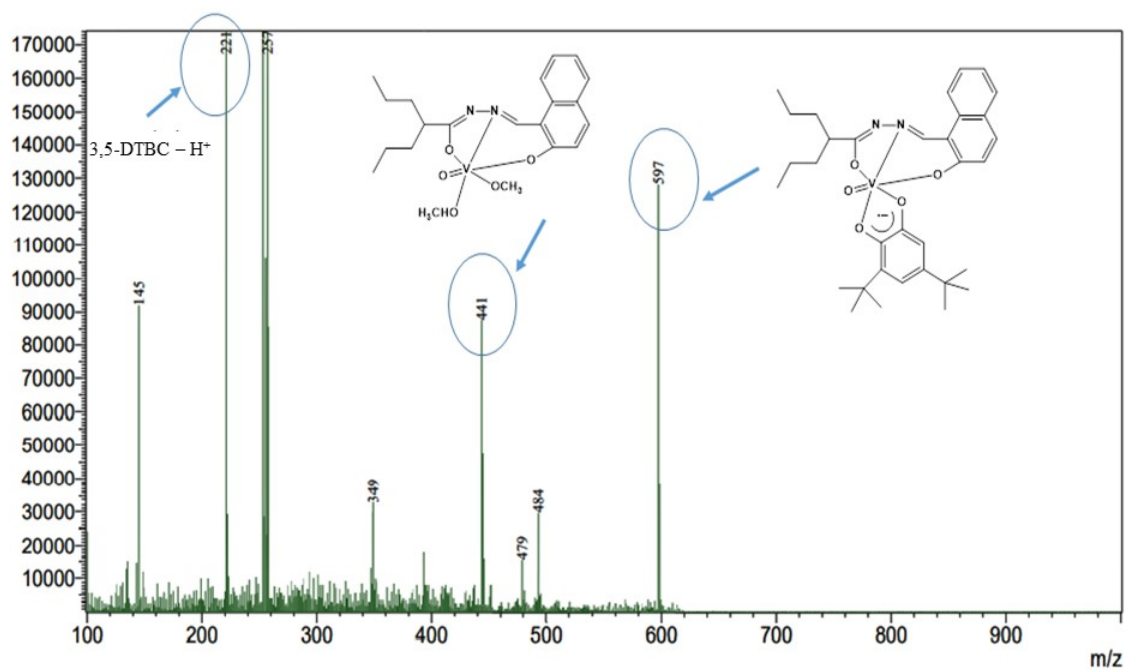

**Figure S13.** (-Ve) ESI-MS spectra of [Complex 4 + 3,5-DTBC] system

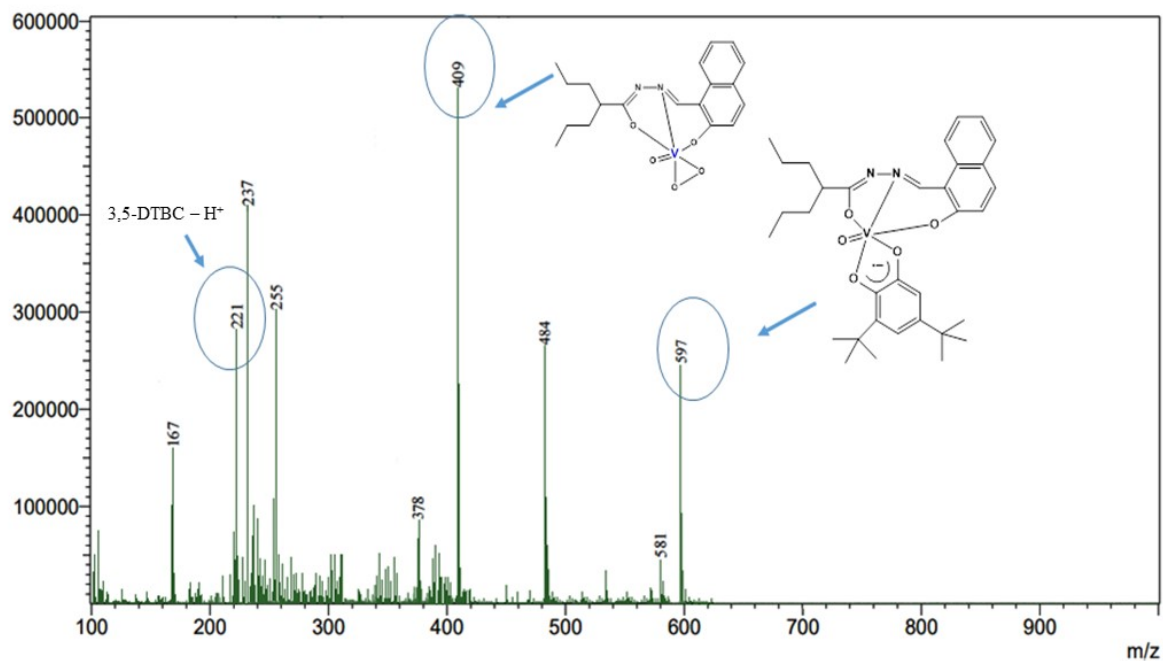

**Figure S14.** (-Ve) ESI-MS spectra of [Complex 2 + 3,5-DTBC] system.

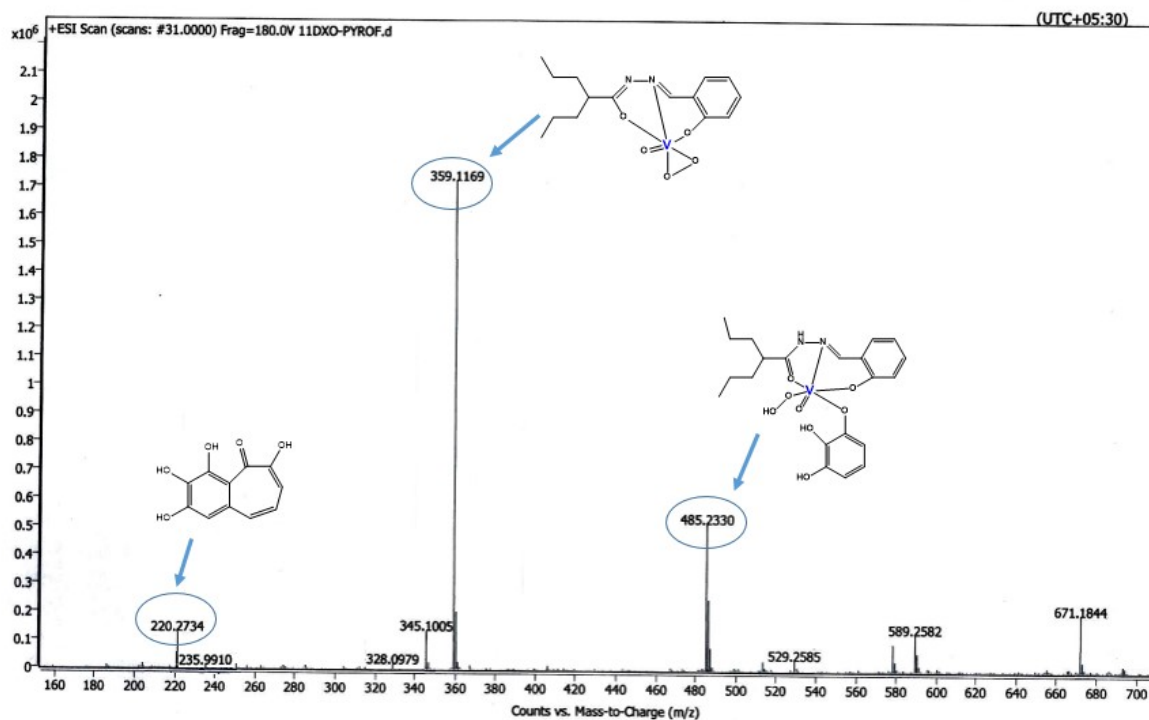

Figure S15. (+Ve) ESI-MS spectra of [Complex 1 + pyrogallol] system.

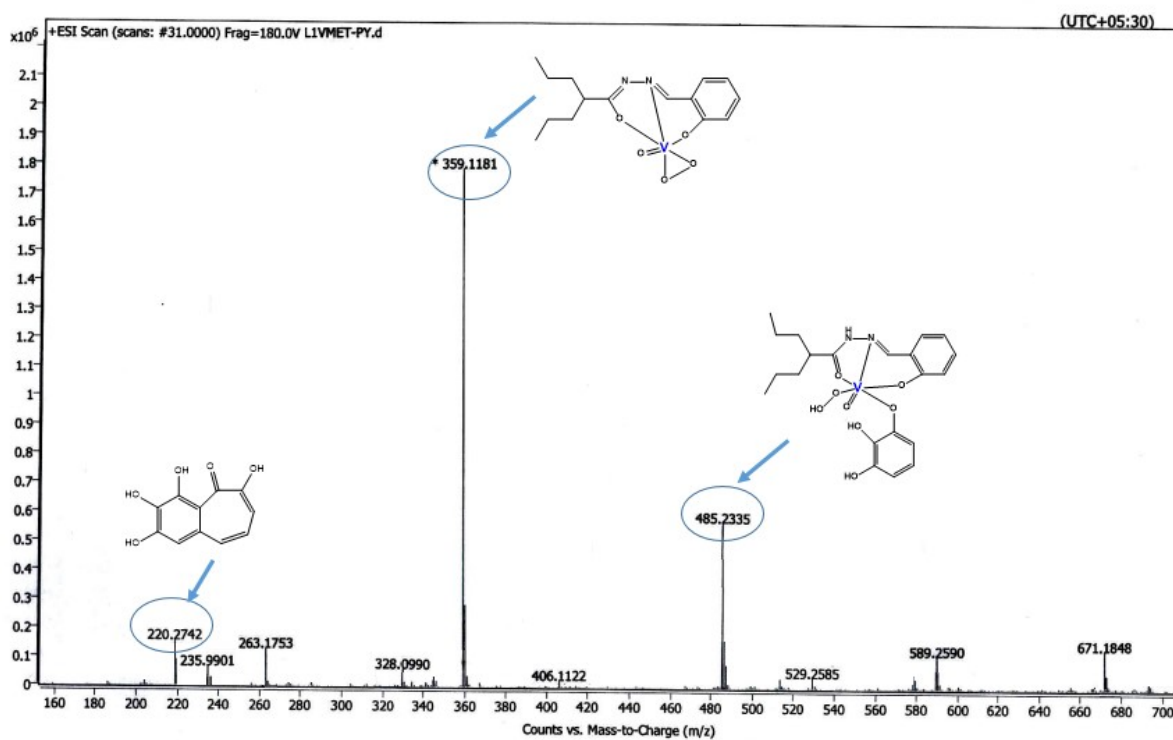

Figure S16. (+Ve) ESI-MS spectra of [Complex 3 + pyrogallol] system

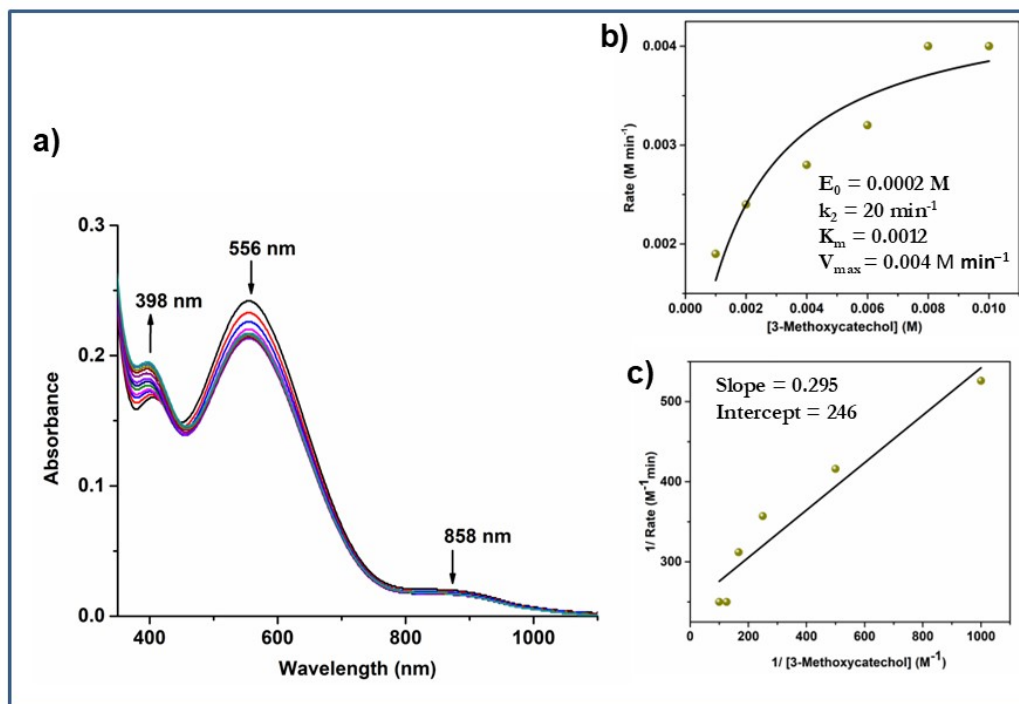

**Figure S17**(a) Absorption spectra of a solution containing  $2 \times 10^{-4}$  M of complex **3** and 0.004 M of 3-Methoxycatechol recorded at the interval of 5 min in methanol. (b) Plot of rate versus concentration of 3-Methoxycatechol for the oxidation reaction catalysed by complex**3**. (c) Lineweaver–Burk plot

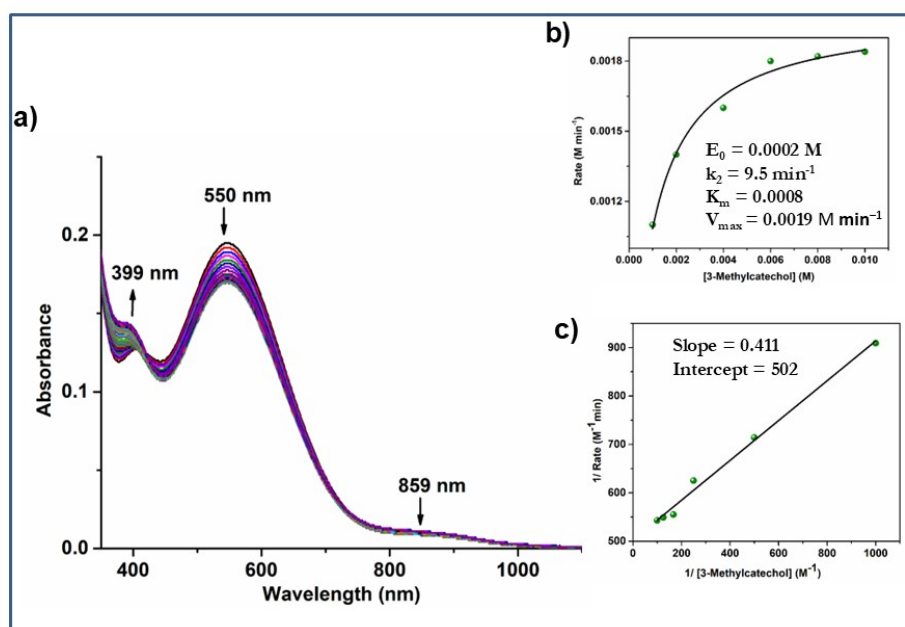

**Figure S18**(a) Absorption spectra of a solution containing  $2 \times 10^{-4}$  M of complex **3** and 0.004 M of 3-Methylcatechol recorded at the interval of 5 min in methanol. (b) Plot of rate versus concentration of 3-Methylcatechol for the oxidation reaction catalysed by complex **3**. (c) Lineweaver–Burk plot.



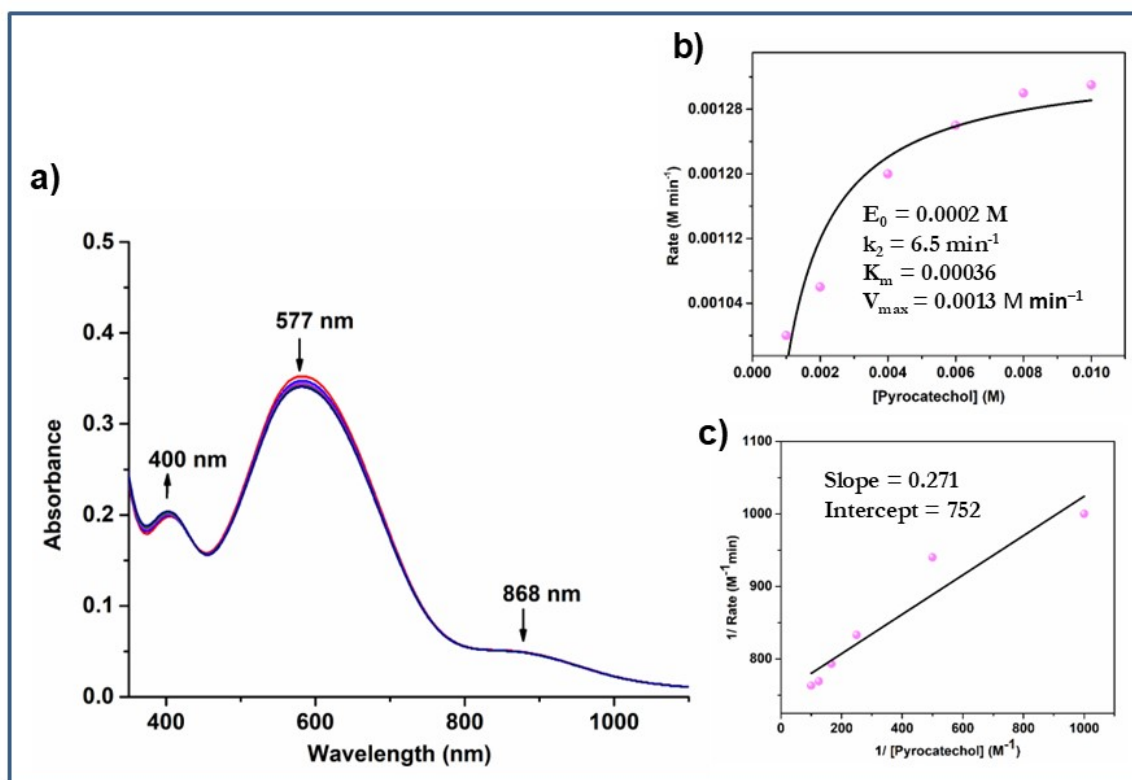

**Figure S19**(a) Absorption spectra of a solution containing  $2 \times 10^{-4}$  M of complex **3** and 0.004 M of pyrocatechol recorded at the interval of 5 min in methanol. (b) Plot of rate versus concentration of pyrocatechol for the oxidation reaction catalysed by complex **3**. (c) Lineweaver–Burk plot.

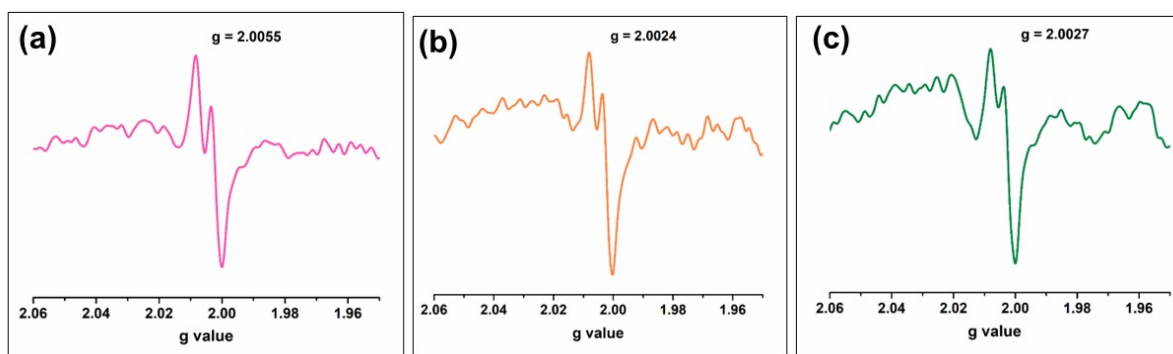

**Figure S20.** X-band EPR spectra of a) 3-Methoxycatechol with complex **3**, a) 3-Methylcatechol with complex **3**, a) Pyrocatechol with complex **3**

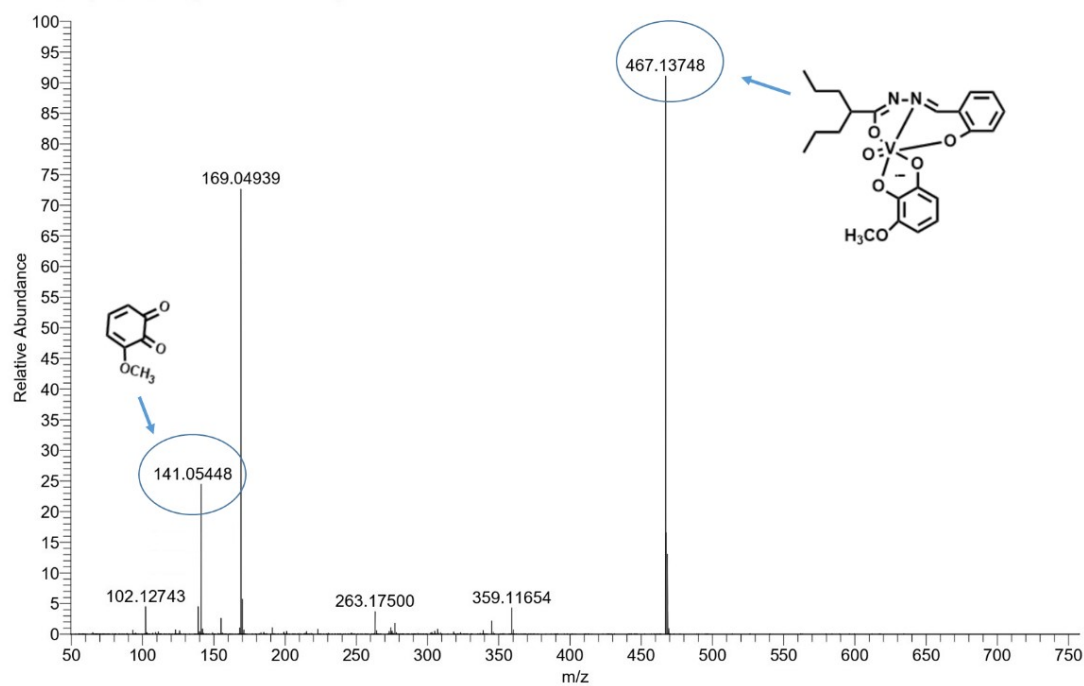

**Figure S21.** (+Ve) ESI-MS spectra of [Complex 3 + 3-Methoxycatechol] system.

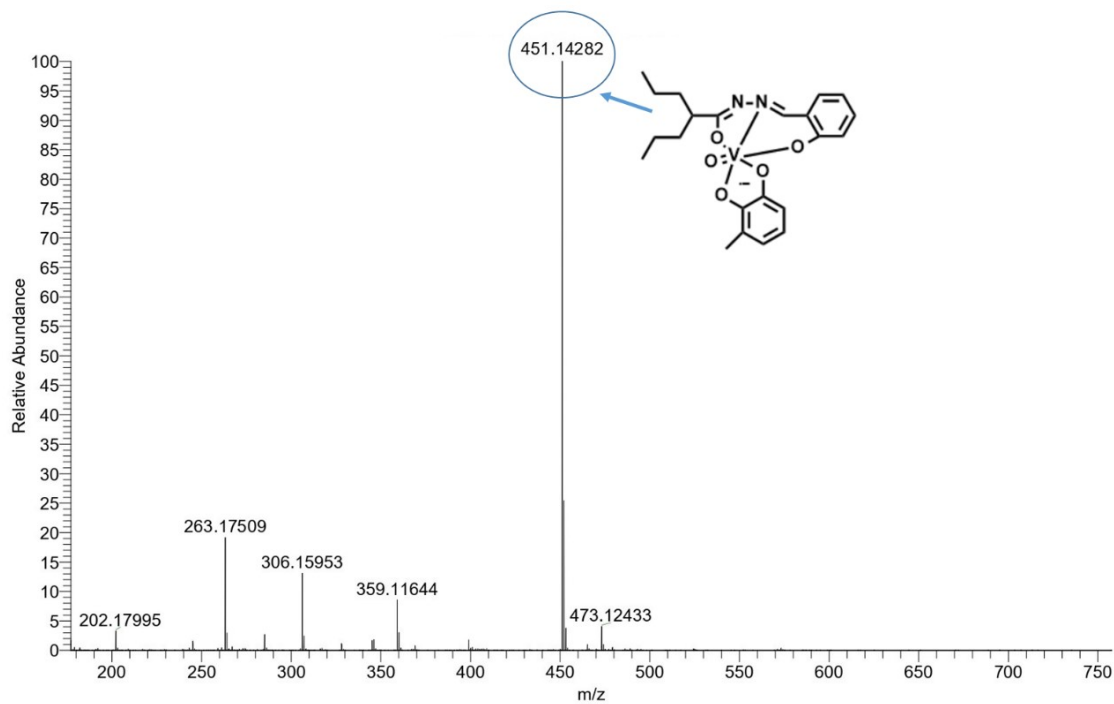

**Figure S22.** (+Ve) ESI-MS spectra of [Complex 3 + 3-Methylcatechol] system.

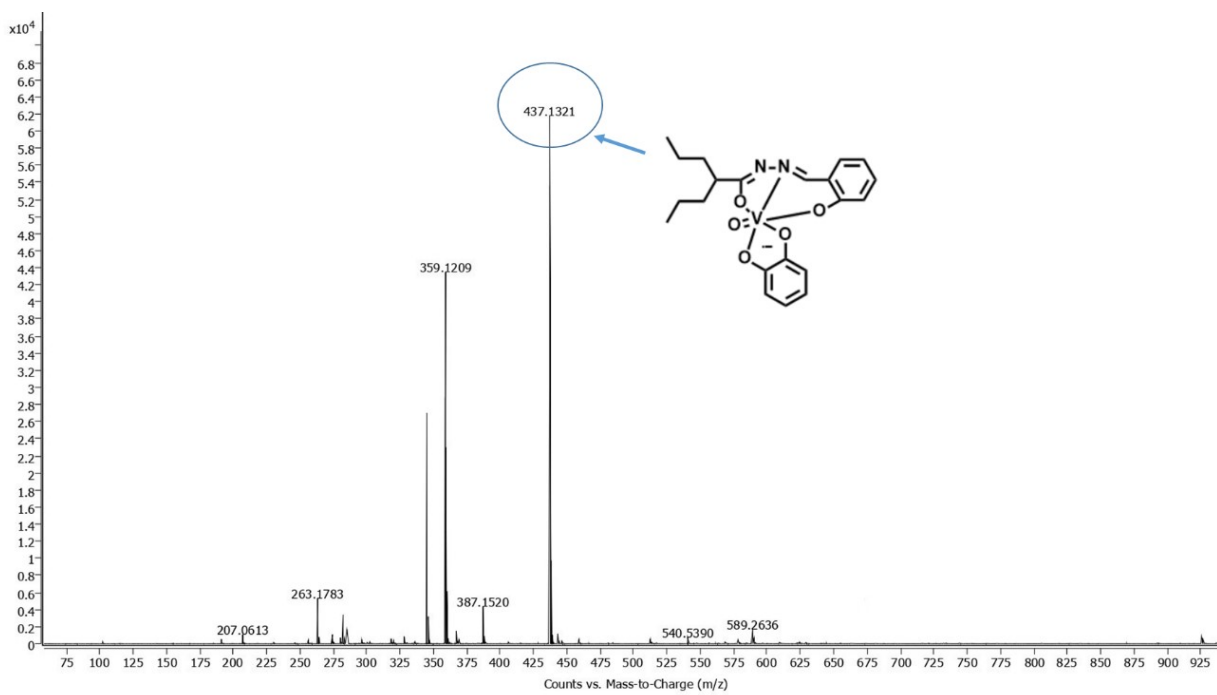

**Figure S23.** (+Ve) ESI-MS spectra of [Complex 3 + pyrocatechol] system.

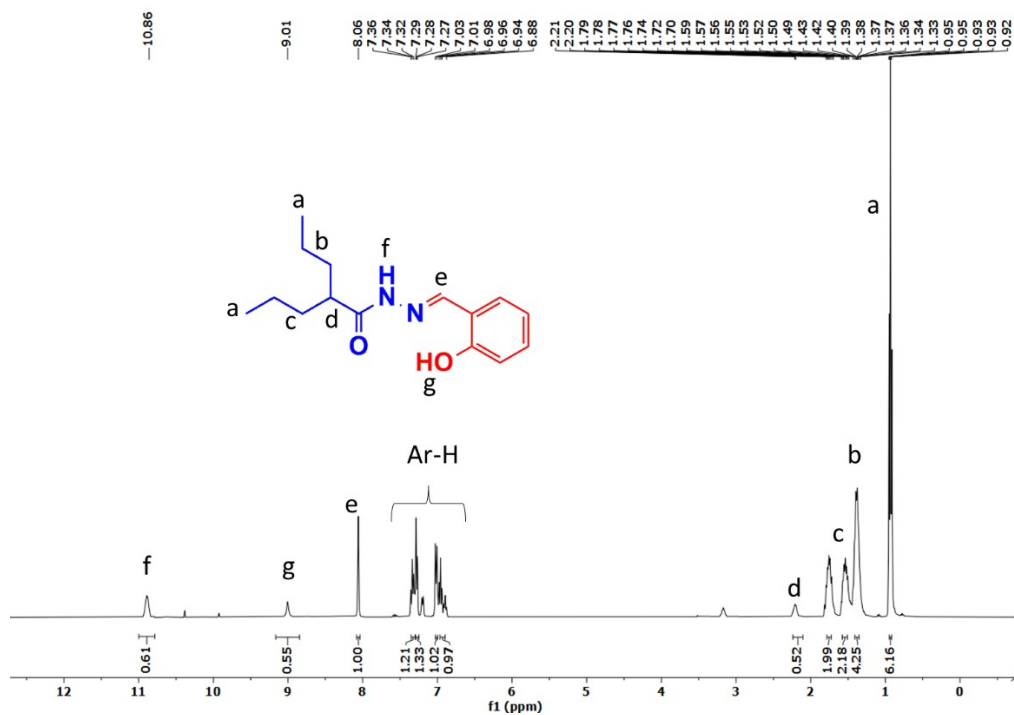

Figure S24.  $^1\text{H}$  NMR spectra of ligand  $\text{H}_2\text{L}^1$  in  $\text{CDCl}_3$ .

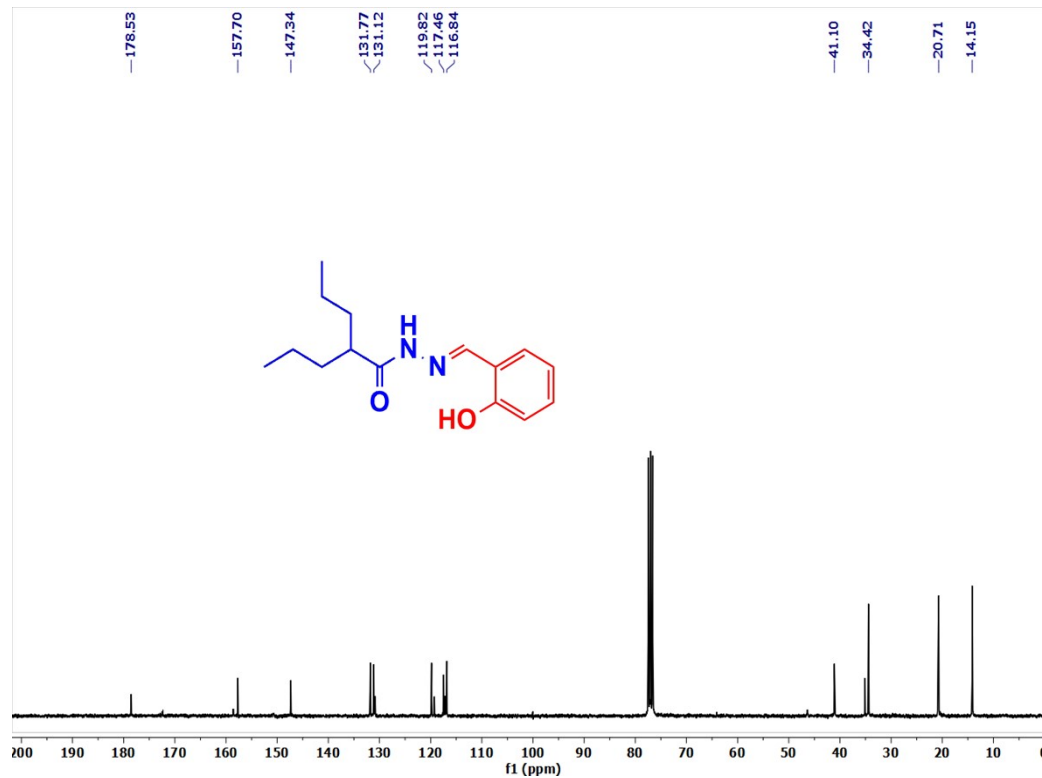

Figure S25.  $^{13}\text{C}$  NMR spectra of ligand  $\text{H}_2\text{L}^1$  in  $\text{CDCl}_3$ .

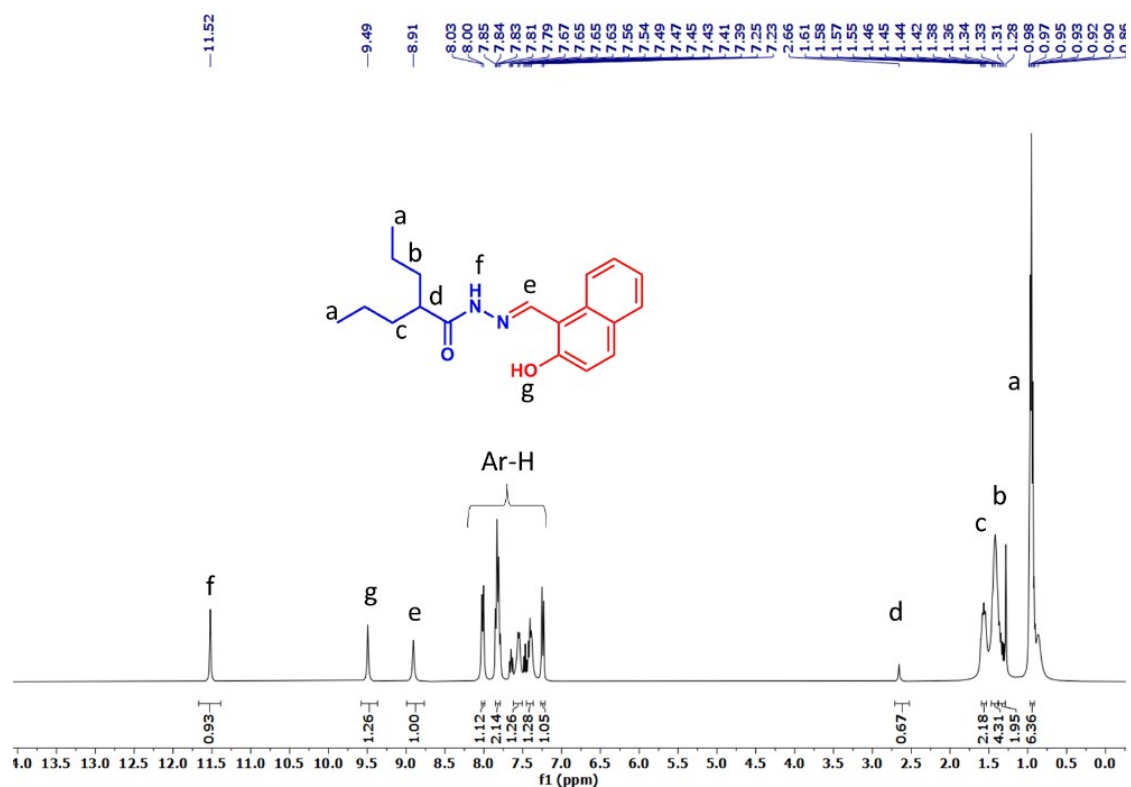Figure S26.  $^1H$  NMR spectra of ligand  $H_2L^2$  in  $CDCl_3$ .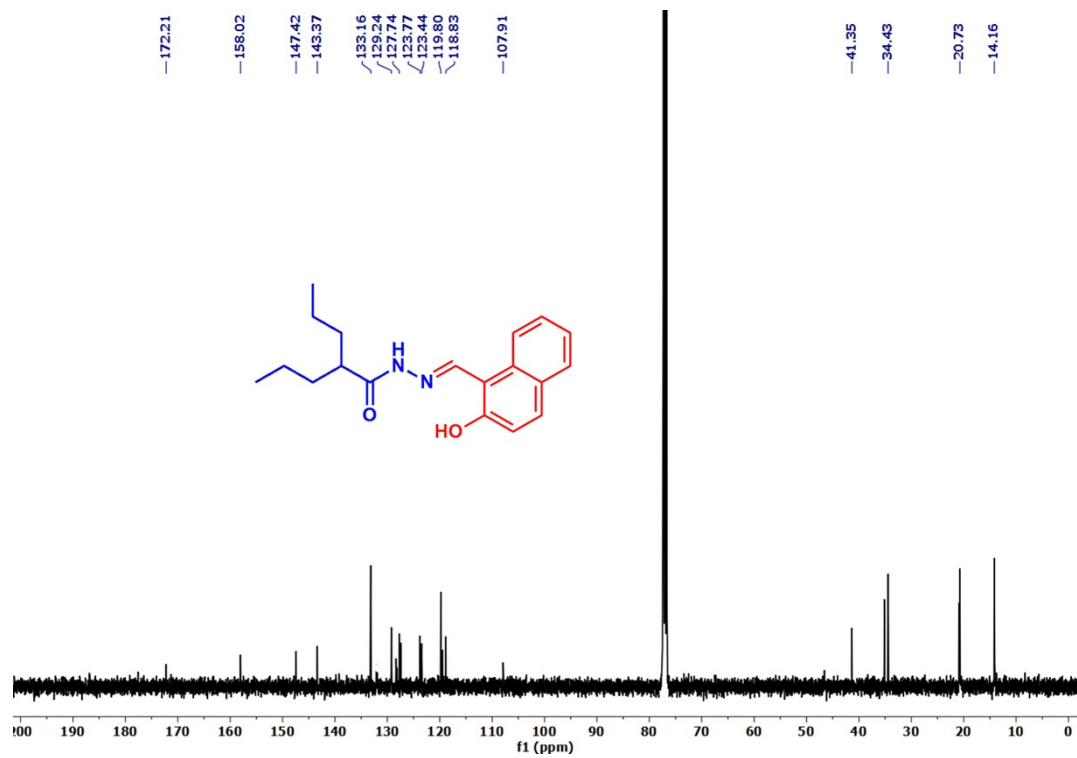Figure S27.  $^{13}C$  NMR spectra of ligand  $H_2L^2$  in  $CDCl_3$ .

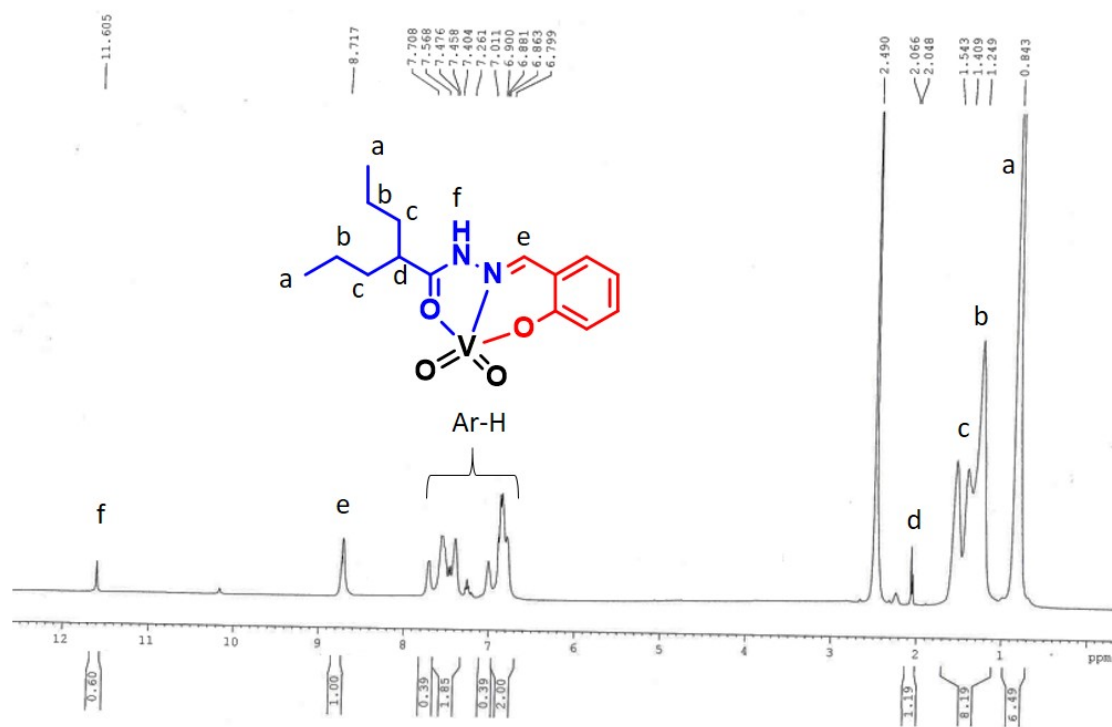

Figure S28.  $^1\text{H}$  NMR spectra of Complex 1 in DMSO-D6

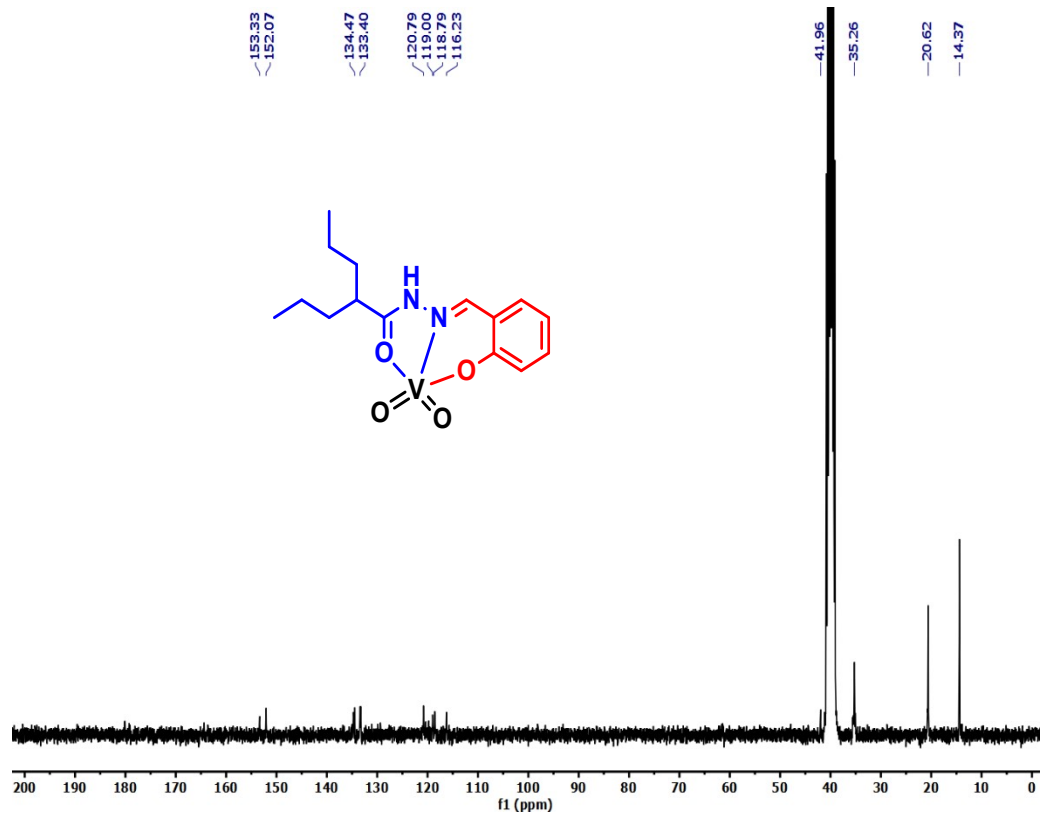

Figure S29.  $^{13}\text{C}$  NMR spectra of Complex 1 in DMSO-D6

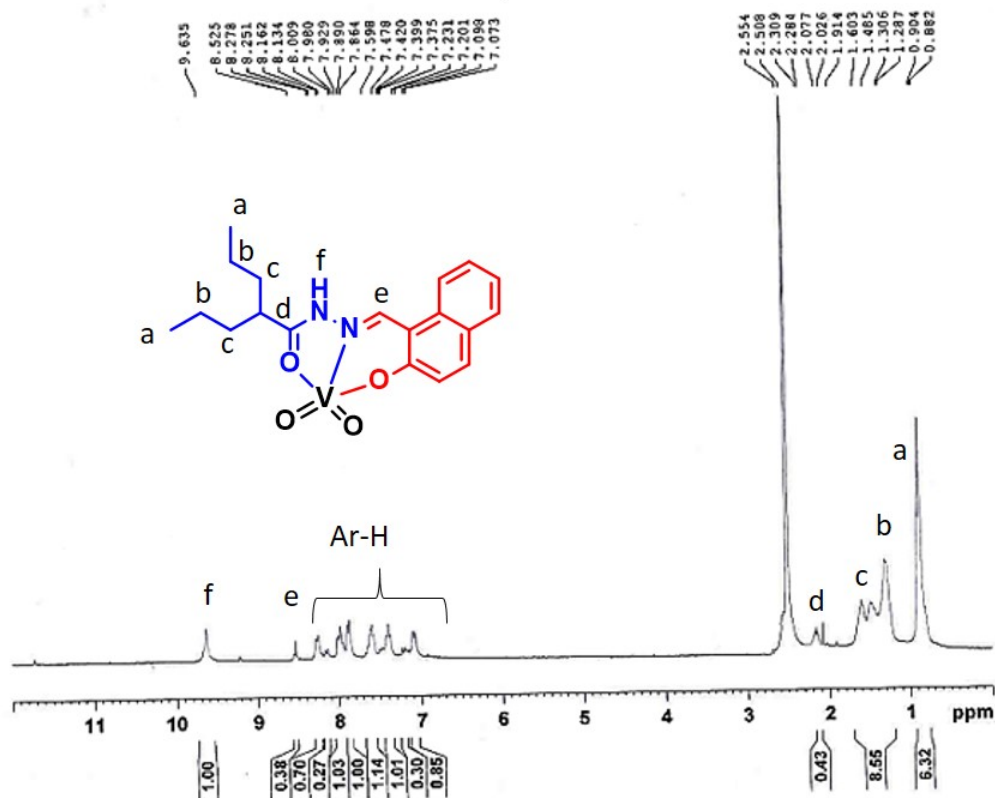

Figure S30.  $^1\text{H}$  NMR spectra of Complex 2 in DMSO-D6

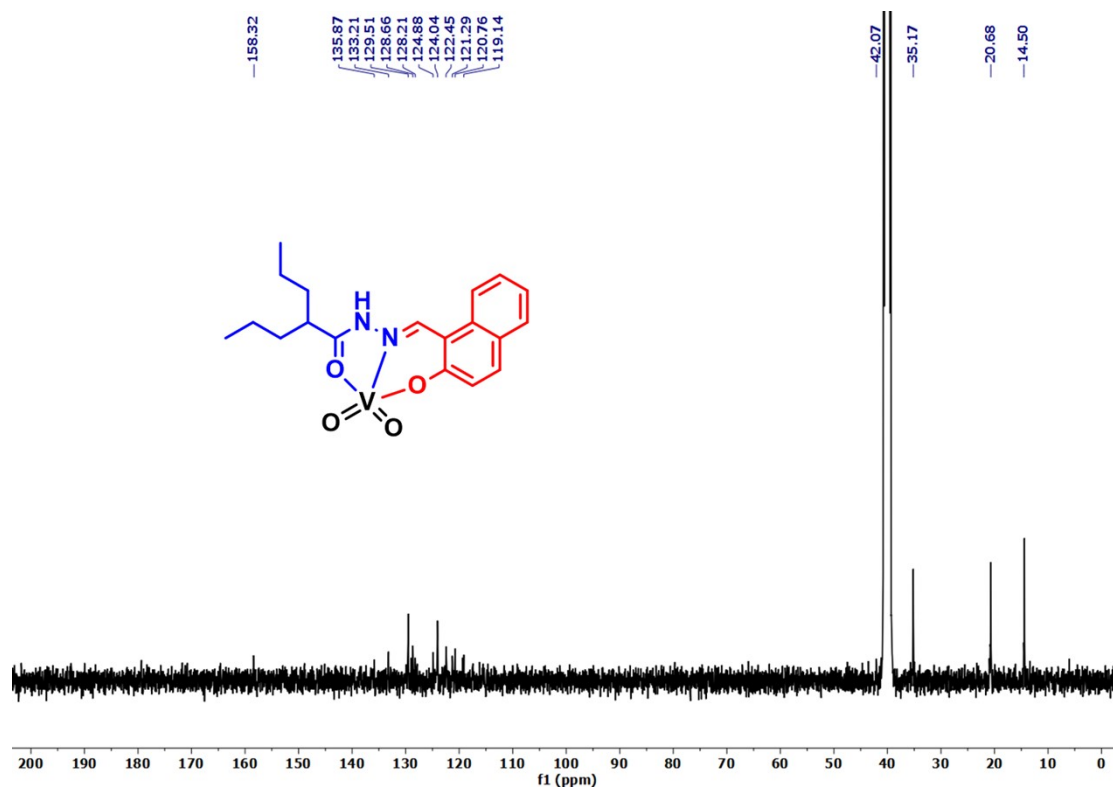

Figure S31.  $^{13}\text{C}$  NMR spectra of Complex 2 in DMSO-D6

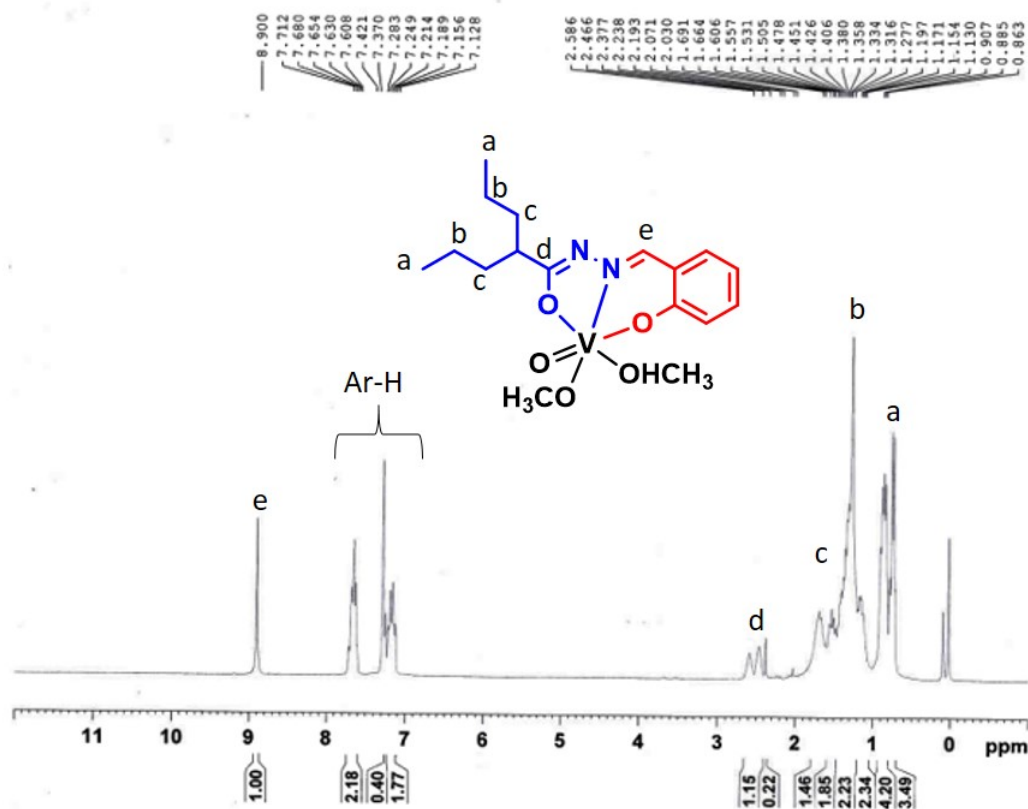

Figure S32.  $^1\text{H}$  NMR spectra of complex 3 in  $\text{CDCl}_3$

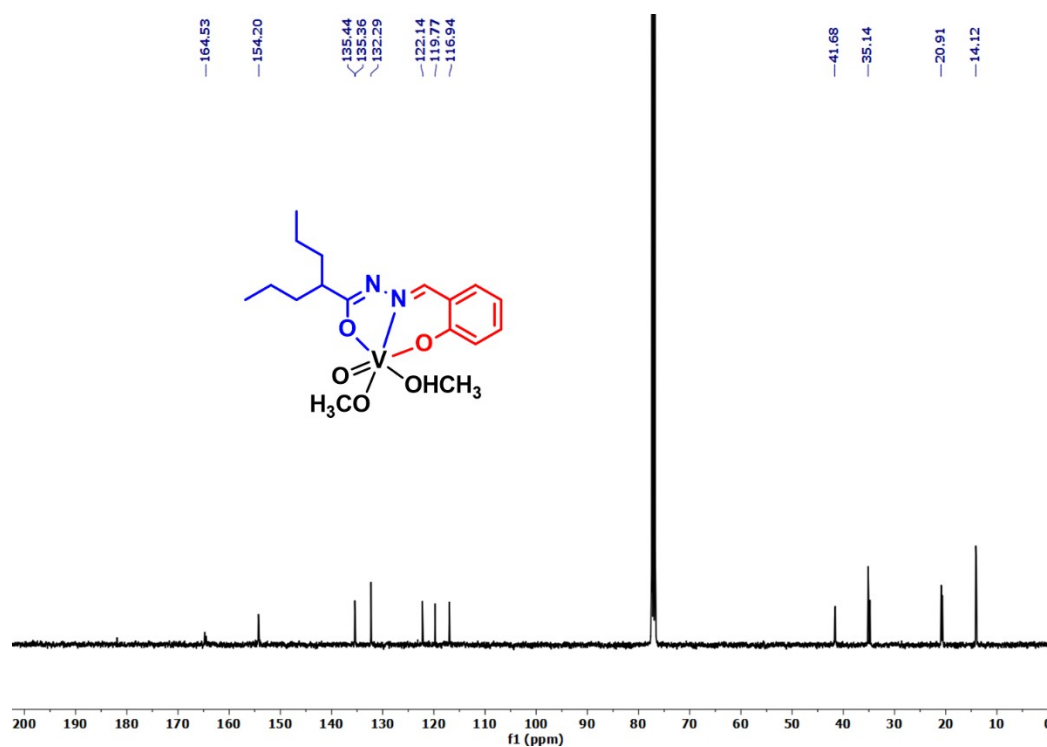

Figure S33.  $^{13}\text{C}$  NMR spectra of Complex 3 in  $\text{CDCl}_3$



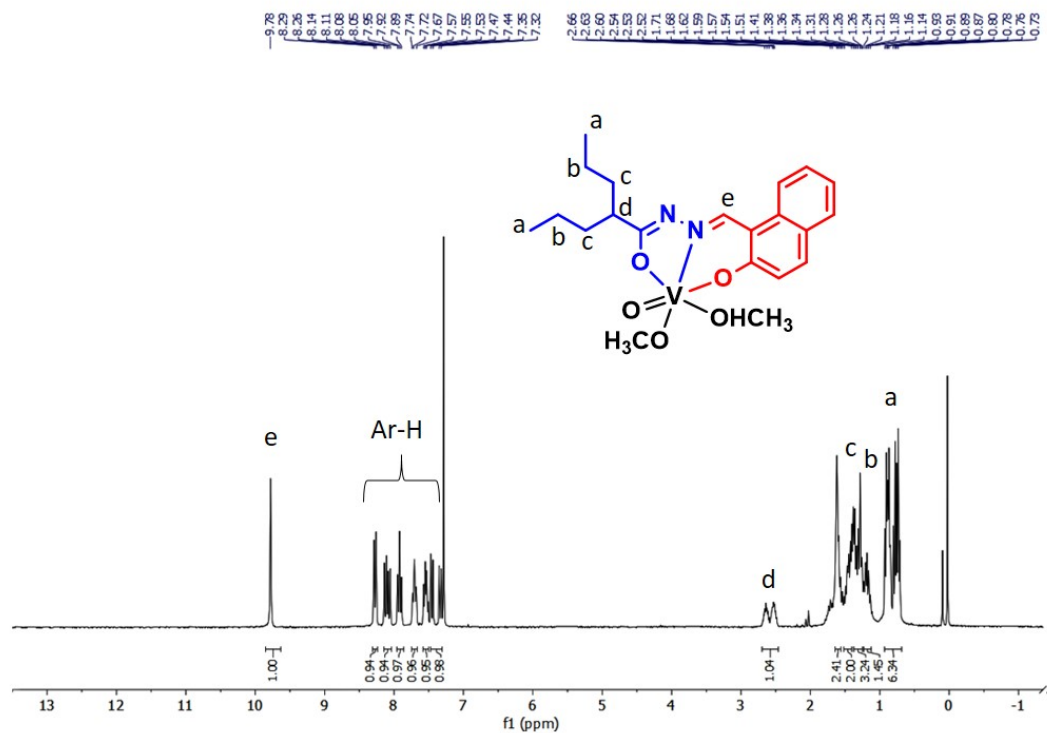

Figure S34. <sup>1</sup>H NMR spectra of complex 4 in CDCl<sub>3</sub>

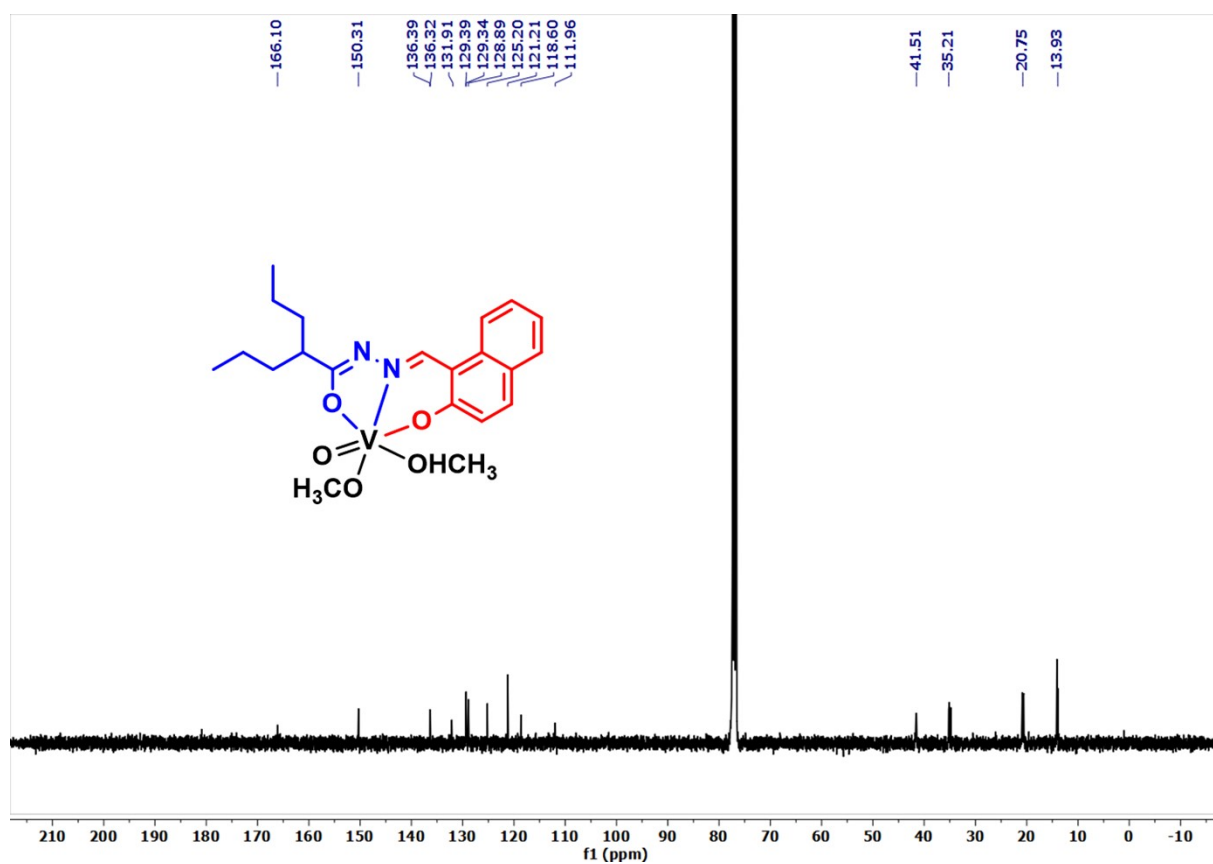

Figure S35. <sup>13</sup>C NMR spectra of Complex 4 in CDCl<sub>3</sub>

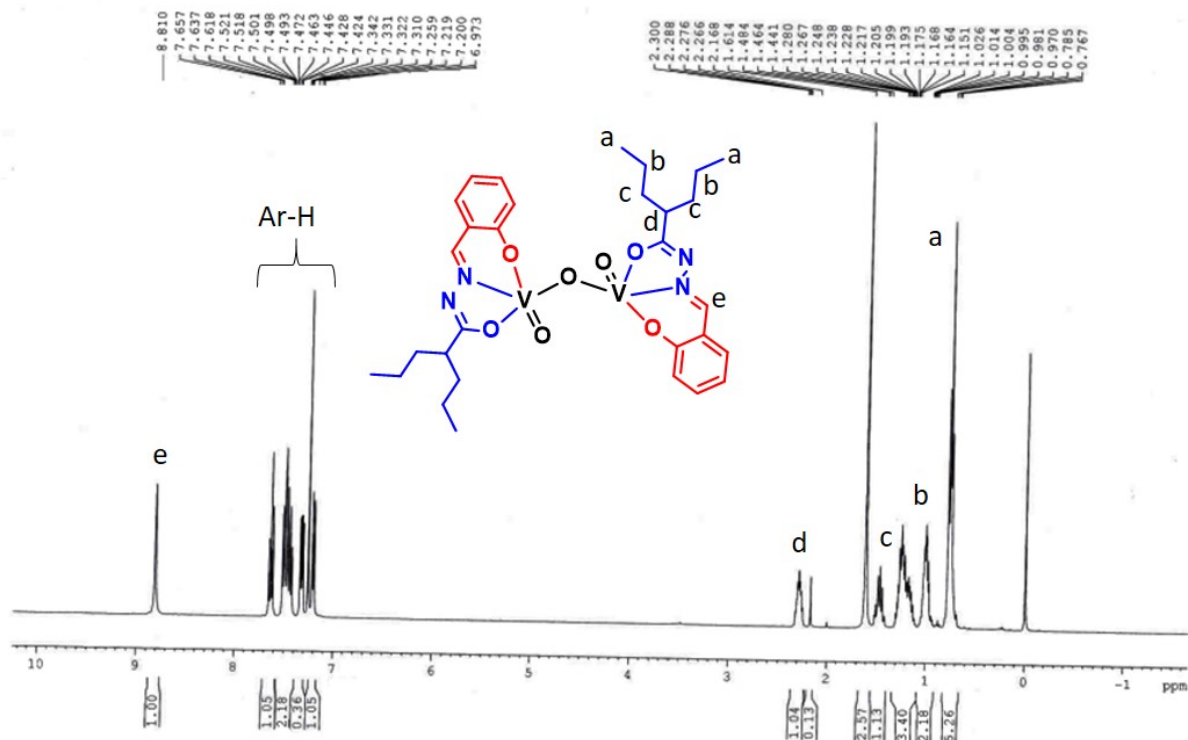

**Figure S36.**  $^1\text{H}$  NMR spectra of complex **5** in  $\text{CDCl}_3$

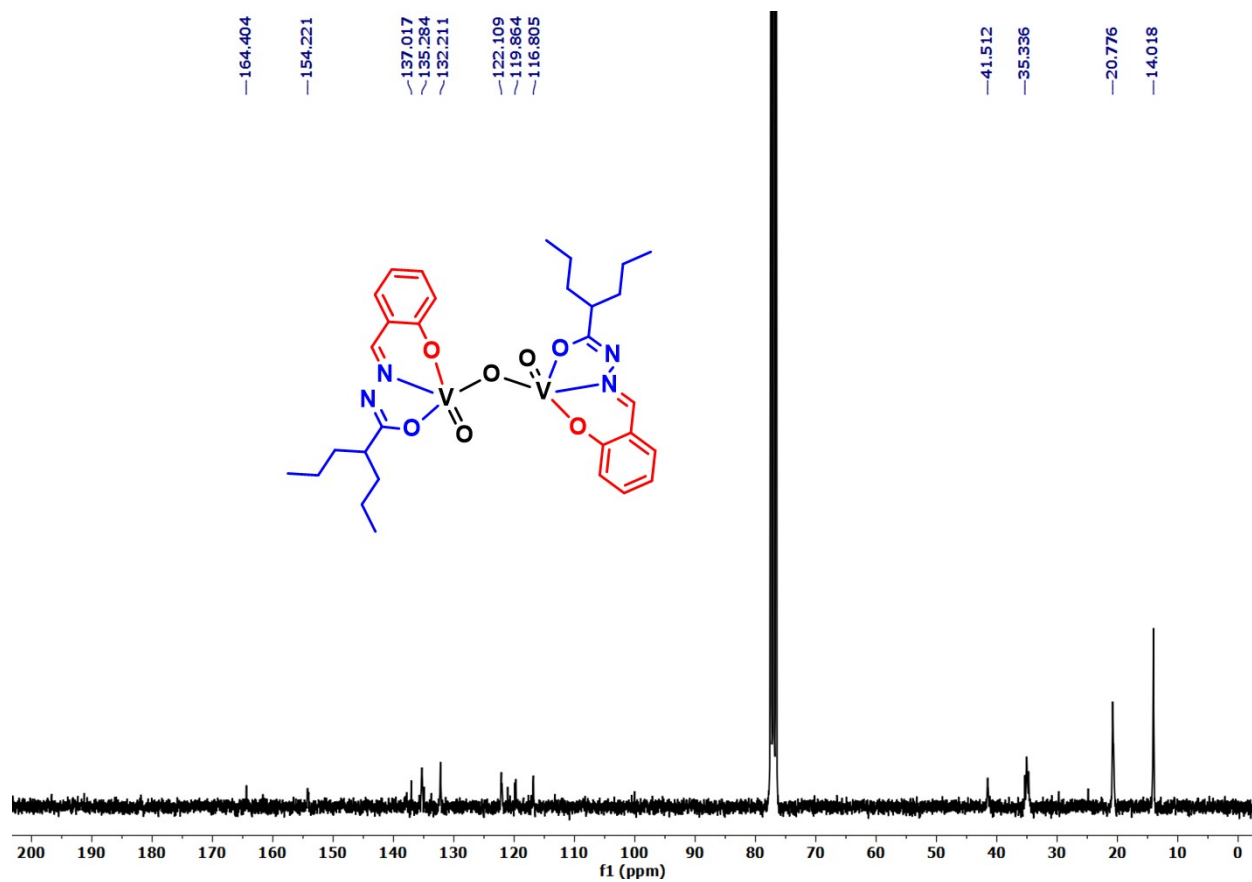

**Figure S37.**  $^{13}\text{C}$  NMR spectra of Complex **5** in  $\text{CDCl}_3$

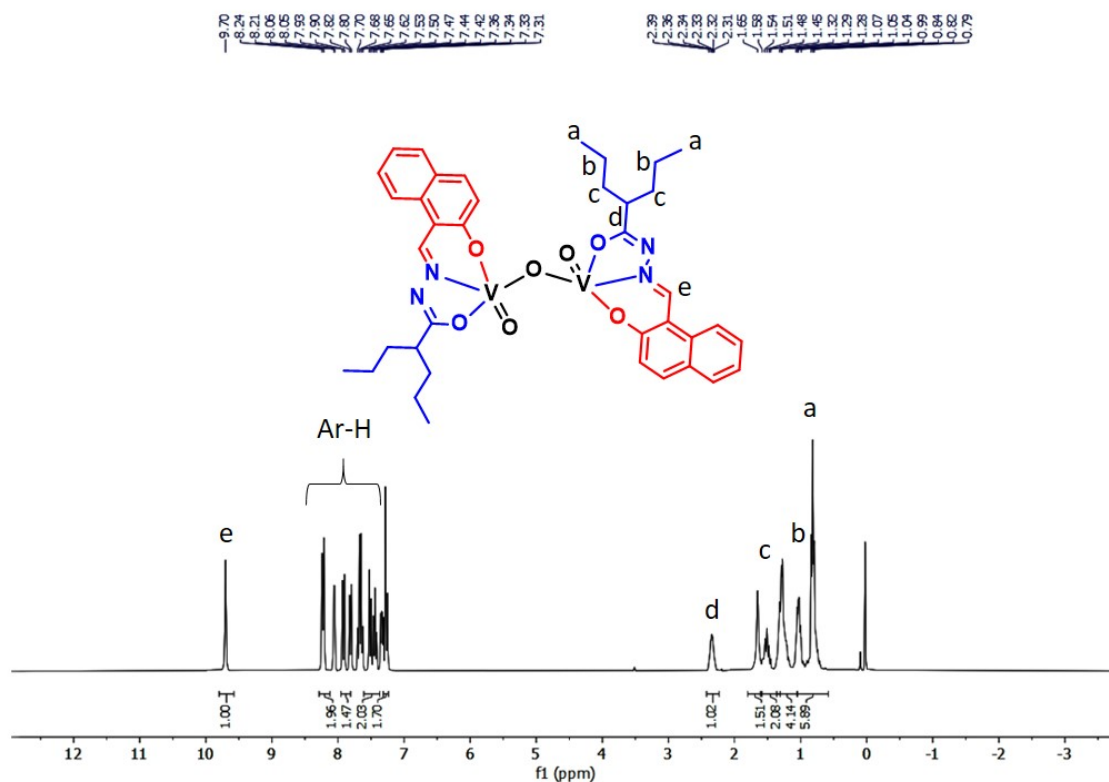

Fig

ure S38.  $^1\text{H}$  NMR spectra of complex **6** in  $\text{CDCl}_3$ 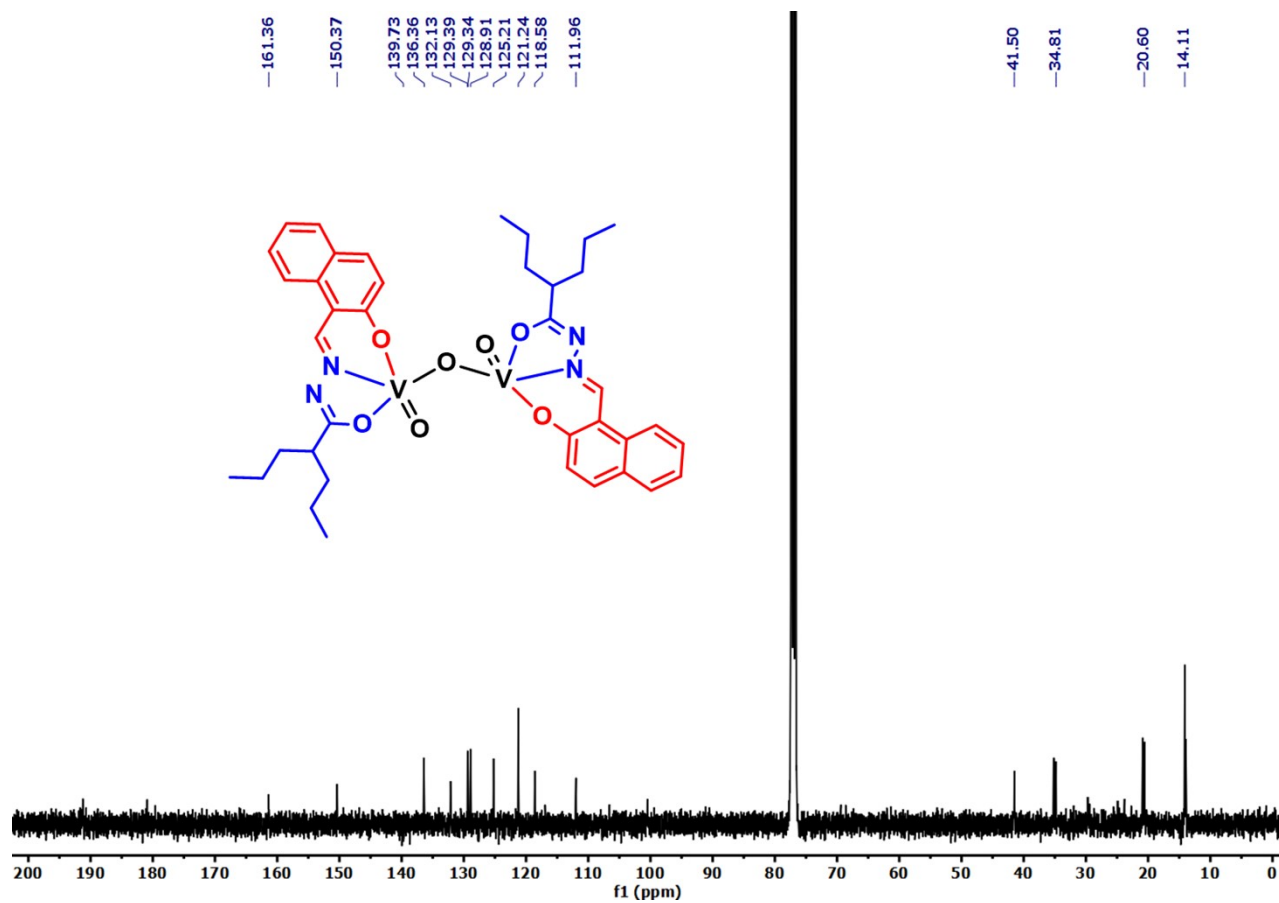Figure S39.  $^{13}\text{C}$  NMR spectra of Complex **6** in  $\text{CDCl}_3$

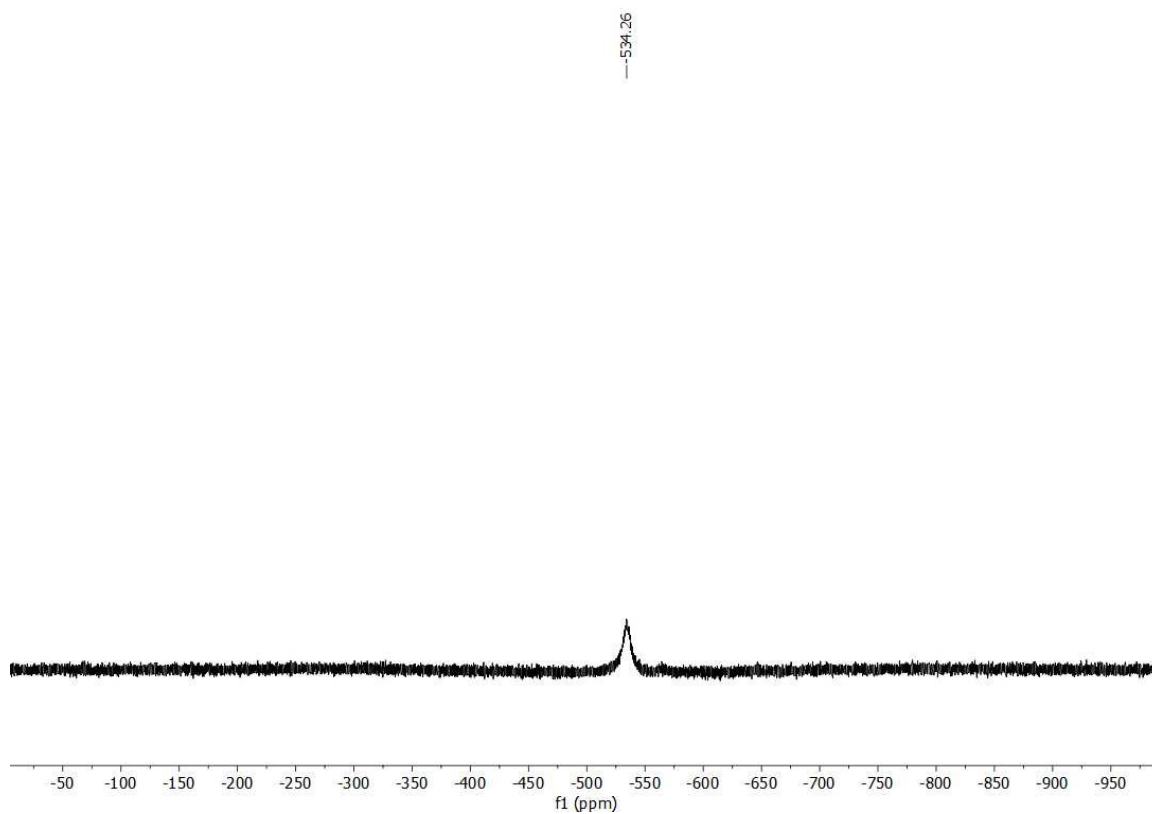

**Figure S40.**  $^{51}\text{V}$  NMR spectra of complex **4** in  $\text{CDCl}_3$ .

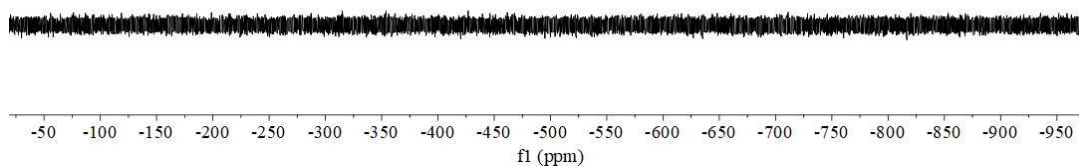

**Figure S41.**  $^{51}\text{V}$  NMR spectra of [Complex **4** + 3,5-DTBC] in  $\text{CDCl}_3$ .

## Computational simulation details

**Table S11** Methods and Parameters for Simulation Calculations

|             |                                     |
|-------------|-------------------------------------|
| Method      | DFT                                 |
| Functional  | B3LYP                               |
| Basis Set   | 6-31+G (H)<br>6-311 +G (C, N, O, V) |
| Job Type    | Optimization                        |
| Solvation   | Gas Phase                           |
| Convergence | SCF (Self Consistent Field Model)   |

**Table S12** Gas Phase Optimized Coordinates of **1** (Singlet Spin State)

| Centre Number | Atomic Number | Coordinates (Angstroms) |          |          |
|---------------|---------------|-------------------------|----------|----------|
|               |               | X                       | Y        | Z        |
| 1             | 23            | 0.830416                | 0.71125  | 1.359265 |
| 2             | 8             | 2.639132                | 0.099143 | 1.246826 |
| 3             | 8             | -1.18743                | 0.286681 | 0.902801 |
| 4             | 8             | 0.842526                | 2.252028 | 0.926814 |
| 5             | 7             | 0.756678                | -0.47114 | -0.56009 |
| 6             | 7             | -0.53097                | -0.66945 | -1.0067  |
| 7             | 8             | 0.559003                | 0.580136 | 2.927354 |
| 8             | 6             | 3.502698                | -0.2029  | 0.315077 |
| 9             | 6             | 3.116023                | -0.68059 | -0.9805  |
| 10            | 6             | 1.740738                | -0.82892 | -1.33213 |
| 11            | 1             | 1.516274                | -1.26819 | -2.3111  |
| 12            | 6             | -1.51098                | -0.23212 | -0.18638 |
| 13            | 6             | -2.95309                | -0.40397 | -0.60171 |
| 14            | 1             | -2.9686                 | -0.83444 | -1.61529 |
| 15            | 6             | -3.62962                | -1.40989 | 0.368258 |
| 16            | 1             | -2.99132                | -2.30104 | 0.455722 |
| 17            | 1             | -3.66463                | -0.95879 | 1.3677   |
| 18            | 6             | -5.03435                | -1.85606 | -0.06299 |
| 19            | 1             | -4.99286                | -2.25807 | -1.08643 |
| 20            | 1             | -5.71179                | -0.99383 | -0.09607 |
| 21            | 6             | -5.61923                | -2.91682 | 0.878556 |
| 22            | 1             | -4.98994                | -3.81536 | 0.906888 |
| 23            | 1             | -6.62198                | -3.22083 | 0.556526 |
| 24            | 1             | -5.69894                | -2.53495 | 1.903856 |
| 25            | 6             | -3.64937                | 0.976946 | -0.63898 |

|    |   |          |          |          |
|----|---|----------|----------|----------|
| 26 | 1 | -3.62938 | 1.400084 | 0.373355 |
| 27 | 1 | -4.70256 | 0.819692 | -0.90063 |
| 28 | 6 | -3.02864 | 1.974127 | -1.62895 |
| 29 | 1 | -1.98563 | 2.176644 | -1.3504  |
| 30 | 1 | -3.00688 | 1.525971 | -2.63435 |
| 31 | 6 | -3.79564 | 3.301151 | -1.68059 |
| 32 | 1 | -4.83796 | 3.14751  | -1.98874 |
| 33 | 1 | -3.33493 | 3.996538 | -2.39149 |
| 34 | 1 | -3.80408 | 3.787853 | -0.69785 |
| 35 | 6 | 4.110156 | -1.04515 | -1.92503 |
| 36 | 1 | 3.795417 | -1.41181 | -2.90068 |
| 37 | 6 | 5.45388  | -0.93471 | -1.62559 |
| 38 | 1 | 6.207379 | -1.2092  | -2.35747 |
| 39 | 6 | 5.834753 | -0.4597  | -0.35047 |
| 40 | 1 | 6.89083  | -0.37061 | -0.10698 |
| 41 | 6 | 4.88975  | -0.10656 | 0.59758  |
| 42 | 1 | 5.176497 | 0.253246 | 1.580701 |
| 43 | 1 | -0.71282 | -1.09784 | -1.91004 |

**Table S13** Gas Phase Optimized Coordinates of **I<sup>-</sup>** (Doublet Spin State)

| Center Number | Atomic Number | Coordinates (Angstroms) |          |          |
|---------------|---------------|-------------------------|----------|----------|
|               |               | X                       | Y        | Z        |
| 1             | 23            | 0.866537                | -0.11425 | 1.520081 |
| 2             | 8             | 2.699865                | -0.44111 | 1.156962 |
| 3             | 8             | -1.22959                | -0.02244 | 0.997394 |
| 4             | 8             | 0.840799                | 1.34516  | 2.212225 |
| 5             | 7             | 0.743968                | -0.22284 | -0.60311 |
| 6             | 7             | -0.53286                | -0.1618  | -1.11073 |
| 7             | 8             | 0.546847                | -1.26969 | 2.603506 |
| 8             | 6             | 3.557168                | -0.26261 | 0.165397 |
| 9             | 6             | 3.114883                | -0.11582 | -1.20132 |
| 10            | 6             | 1.739416                | -0.11124 | -1.52822 |
| 11            | 1             | 1.449958                | 0.024848 | -2.57432 |
| 12            | 6             | -1.53163                | -0.07165 | -0.22578 |
| 13            | 6             | -2.9679                 | -0.0455  | -0.70505 |
| 14            | 1             | -2.96057                | -0.0049  | -1.80715 |
| 15            | 6             | -3.67798                | -1.35586 | -0.27735 |
| 16            | 1             | -3.04198                | -2.20426 | -0.56744 |
| 17            | 1             | -3.73278                | -1.38016 | 0.818683 |
| 18            | 6             | -5.07399                | -1.55995 | -0.88346 |
| 19            | 1             | -5.01219                | -1.47223 | -1.97938 |

|    |   |          |          |          |
|----|---|----------|----------|----------|
| 20 | 1 | -5.75407 | -0.76532 | -0.54966 |
| 21 | 6 | -5.68052 | -2.92168 | -0.51803 |
| 22 | 1 | -5.04836 | -3.74556 | -0.87383 |
| 23 | 1 | -6.67736 | -3.04865 | -0.95983 |
| 24 | 1 | -5.77979 | -3.03007 | 0.569637 |
| 25 | 6 | -3.6751  | 1.22132  | -0.17145 |
| 26 | 1 | -3.65866 | 1.181913 | 0.925599 |
| 27 | 1 | -4.72897 | 1.199811 | -0.48109 |
| 28 | 6 | -3.04326 | 2.539535 | -0.64073 |
| 29 | 1 | -2.00128 | 2.586347 | -0.30124 |
| 30 | 1 | -3.01695 | 2.561874 | -1.74146 |
| 31 | 6 | -3.79762 | 3.771298 | -0.12459 |
| 32 | 1 | -4.84208 | 3.774796 | -0.46674 |
| 33 | 1 | -3.32806 | 4.700234 | -0.47148 |
| 34 | 1 | -3.8052  | 3.793436 | 0.972449 |
| 35 | 6 | 4.108541 | 0.027243 | -2.21209 |
| 36 | 1 | 3.779608 | 0.13681  | -3.24616 |
| 37 | 6 | 5.467189 | 0.029957 | -1.91597 |
| 38 | 1 | 6.197146 | 0.142542 | -2.71598 |
| 39 | 6 | 5.888619 | -0.11032 | -0.58181 |
| 40 | 1 | 6.948989 | -0.10758 | -0.33593 |
| 41 | 6 | 4.936515 | -0.2537  | 0.436566 |
| 42 | 1 | 5.23862  | -0.36627 | 1.474981 |
| 43 | 1 | -0.68352 | -0.23886 | -2.11223 |

**Table S14** Gas Phase Spin densities of **1<sup>-</sup>**(Doublet Spin State)

| Atom Number | Atom Type | Mullikan Charges | Spin Densities |
|-------------|-----------|------------------|----------------|
| 1           | V         | 1.235778         | -0.0054        |
| 2           | O         | -0.54858         | 0.026677       |
| 3           | O         | -0.36911         | 0.021666       |
| 4           | O         | -0.40229         | 0.02411        |
| 5           | N         | 0.023317         | 0.135699       |
| 6           | N         | -0.21279         | -0.03091       |
| 7           | O         | -0.43597         | 0.03419        |
| 8           | C         | -0.25185         | 0.164019       |
| 9           | C         | 2.785987         | -0.14694       |
| 10          | C         | -1.77412         | 0.460604       |
| 12          | C         | -0.34029         | 0.071476       |
| 13          | C         | 0.756852         | 0.03525        |
| 15          | C         | -0.13886         | -0.01151       |
| 18          | C         | 0.264373         | 0.014696       |

|    |   |          |          |
|----|---|----------|----------|
| 21 | C | -0.37398 | -0.00318 |
| 25 | C | -0.21764 | -0.00815 |
| 28 | C | 0.494796 | 0.009259 |
| 31 | C | -0.40529 | -0.00737 |
| 35 | C | -1.15827 | 0.172248 |
| 37 | C | 0.108466 | -0.12303 |
| 39 | C | -0.18973 | 0.228426 |
| 41 | C | 0.14919  | -0.06183 |

**Table S15** Gas Phase Optimized Coordinates of **2** (Singlet Spin State)

| Center Number | Atomic Number | Coordinates (Angstroms) |          |          |
|---------------|---------------|-------------------------|----------|----------|
|               |               | X                       | Y        | Z        |
| 1             | 23            | -0.57398                | -1.89055 | -0.5013  |
| 2             | 8             | 1.35574                 | -1.95216 | -0.65803 |
| 3             | 8             | -2.35115                | -0.79699 | -0.34491 |
| 4             | 7             | -0.01559                | 0.183386 | -0.00298 |
| 5             | 7             | -1.13863                | 0.995127 | 0.243033 |
| 6             | 1             | -1.02978                | 1.948138 | 0.560647 |
| 7             | 8             | -0.8813                 | -2.86001 | 0.753596 |
| 8             | 6             | 3.668275                | 0.820605 | 0.204591 |
| 9             | 8             | -1.0121                 | -2.57607 | -1.89348 |
| 10            | 6             | 2.415813                | 0.104643 | -0.01836 |
| 11            | 6             | 2.446172                | -1.26178 | -0.42514 |
| 12            | 6             | 1.169673                | 0.74728  | 0.164446 |
| 13            | 1             | 1.181386                | 1.7899   | 0.470115 |
| 14            | 6             | 4.901866                | 0.122653 | 0.007824 |
| 15            | 6             | 4.873855                | -1.2524  | -0.39916 |
| 16            | 1             | 5.819285                | -1.7615  | -0.54082 |
| 17            | 6             | 3.745911                | 2.17793  | 0.607563 |
| 18            | 1             | 2.846828                | 2.755216 | 0.771789 |
| 19            | 6             | 3.704403                | -1.91913 | -0.60836 |
| 20            | 1             | 3.674416                | -2.95337 | -0.91621 |
| 21            | 6             | -4.44781                | 1.31767  | -0.94832 |
| 22            | 1             | -4.69611                | 0.318398 | -1.31398 |
| 23            | 1             | -5.38937                | 1.802501 | -0.67451 |
| 24            | 6             | 6.172331                | 2.113165 | 0.607597 |
| 25            | 1             | 7.118368                | 2.612879 | 0.763117 |
| 26            | 6             | -2.33811                | 0.410136 | 0.056979 |
| 27            | 6             | 6.132964                | 0.789194 | 0.215158 |
| 28            | 1             | 7.051629                | 0.23756  | 0.059254 |
| 29            | 6             | 4.96366                 | 2.807641 | 0.803964 |
| 30            | 1             | 4.983598                | 3.844745 | 1.111746 |
| 31            | 6             | -4.40044                | 0.430548 | 1.457656 |
| 32            | 1             | -4.71862                | -0.53768 | 1.064261 |



|    |   |          |          |          |
|----|---|----------|----------|----------|
| 33 | 1 | -5.30526 | 1.012679 | 1.656127 |
| 34 | 6 | -3.60644 | 1.165712 | 0.344754 |
| 35 | 1 | -3.33934 | 2.165655 | 0.708326 |
| 36 | 6 | -3.76115 | 2.121221 | -2.06561 |
| 37 | 1 | -3.46869 | 3.105332 | -1.68039 |
| 38 | 1 | -2.83828 | 1.615518 | -2.36742 |
| 39 | 6 | -3.62171 | 0.217658 | 2.767356 |
| 40 | 1 | -2.75538 | -0.42358 | 2.577561 |
| 41 | 1 | -3.23404 | 1.179213 | 3.125138 |
| 42 | 6 | -4.65827 | 2.301726 | -3.29914 |
| 43 | 1 | -5.57861 | 2.8329   | -3.04411 |
| 44 | 1 | -4.9372  | 1.33531  | -3.72421 |
| 45 | 6 | -4.48343 | -0.42497 | 3.864378 |
| 46 | 1 | -5.34349 | 0.202364 | 4.112306 |
| 47 | 1 | -3.90669 | -0.57795 | 4.777955 |
| 48 | 1 | -4.85967 | -1.39861 | 3.543762 |
| 49 | 1 | -4.14881 | 2.87225  | -4.07756 |

**Table S16** Gas Phase Optimized Coordinates of  $2^-$  (Doublet Spin State)

| Center Number | Atomic Number | Coordinates (Angstrom) |          |          |
|---------------|---------------|------------------------|----------|----------|
|               |               | X                      | Y        | Z        |
| 1             | 23            | 0.496235               | 1.847532 | 0.642002 |
| 2             | 8             | -1.36721               | 2.064053 | 0.360144 |
| 3             | 8             | 2.36986                | 0.812787 | 0.409732 |
| 4             | 7             | 0.050757               | -0.05507 | -0.1878  |
| 5             | 7             | 1.151745               | -0.85222 | -0.42035 |
| 6             | 1             | 1.039796               | -1.75243 | -0.87666 |
| 7             | 8             | 0.683399               | 1.996804 | 2.238769 |
| 8             | 6             | -3.65307               | -0.79276 | -0.29882 |
| 9             | 8             | 1.0935                 | 3.133682 | -0.1324  |
| 10            | 6             | -2.39567               | -0.06412 | -0.13808 |
| 11            | 6             | -2.45372               | 1.325986 | 0.229917 |
| 12            | 6             | -1.14922               | -0.68088 | -0.33748 |
| 13            | 1             | -1.10818               | -1.7341  | -0.61501 |
| 14            | 6             | -4.905                 | -0.11074 | -0.09106 |
| 15            | 6             | -4.9012                | 1.264211 | 0.271923 |
| 16            | 1             | -5.85136               | 1.771589 | 0.428888 |
| 17            | 6             | -3.71602               | -2.16334 | -0.6557  |
| 18            | 1             | -2.7978                | -2.72023 | -0.8188  |
| 19            | 6             | -3.7061                | 1.949063 | 0.425737 |
| 20            | 1             | -3.69159               | 3.000262 | 0.701877 |
| 21            | 6             | 4.510079               | -0.37919 | -1.37173 |

|    |   |          |          |          |
|----|---|----------|----------|----------|
| 22 | 1 | 4.771801 | 0.59461  | -0.93802 |
| 23 | 1 | 5.447151 | -0.94603 | -1.48011 |
| 24 | 6 | -6.14132 | -2.16476 | -0.60373 |
| 25 | 1 | -7.08702 | -2.69061 | -0.72062 |
| 26 | 6 | 2.343446 | -0.33882 | -0.10166 |
| 27 | 6 | -6.12118 | -0.82758 | -0.25215 |
| 28 | 1 | -7.05575 | -0.29146 | -0.08965 |
| 29 | 6 | -4.91853 | -2.84026 | -0.80749 |
| 30 | 1 | -4.91393 | -3.89329 | -1.08256 |
| 31 | 6 | 4.358643 | -1.389   | 0.963638 |
| 32 | 1 | 4.618312 | -0.41812 | 1.404995 |
| 33 | 1 | 5.304702 | -1.89899 | 0.727338 |
| 34 | 6 | 3.608507 | -1.12866 | -0.36313 |
| 35 | 1 | 3.326435 | -2.09983 | -0.80181 |
| 36 | 6 | 3.880458 | -0.16626 | -2.75511 |
| 37 | 1 | 3.578677 | -1.13885 | -3.17448 |
| 38 | 1 | 2.963881 | 0.42813  | -2.65239 |
| 39 | 6 | 3.573772 | -2.21908 | 1.988404 |
| 40 | 1 | 2.643874 | -1.69673 | 2.245914 |
| 41 | 1 | 3.279137 | -3.1786  | 1.535451 |
| 42 | 6 | 4.829167 | 0.537445 | -3.73365 |
| 43 | 1 | 5.751852 | -0.04039 | -3.88247 |
| 44 | 1 | 5.112549 | 1.528893 | -3.35864 |
| 45 | 6 | 4.373722 | -2.48538 | 3.269712 |
| 46 | 1 | 5.30166  | -3.03386 | 3.056339 |
| 47 | 1 | 3.791623 | -3.07788 | 3.98643  |
| 48 | 1 | 4.64781  | -1.54414 | 3.76257  |
| 49 | 1 | 4.358401 | 0.67593  | -4.71488 |

**Table S17** Gas Phase Spin densities of **2<sup>-</sup>**(Doublet Spin State)

| Center Number | Atomic Number | Mullikan Charges | Spin Densities |
|---------------|---------------|------------------|----------------|
| 1             | V             | 1.216883         | -0.00483       |
| 2             | O             | -0.52968         | 0.043746       |
| 3             | O             | -0.35903         | 0.01699        |
| 4             | N             | 0.113014         | 0.12897        |
| 5             | N             | -0.35079         | -0.02994       |
| 7             | O             | -0.39749         | 0.025149       |
| 8             | C             | 0.461455         | 0.105446       |
| 9             | O             | -0.42829         | 0.034718       |
| 10            | C             | 1.160457         | -0.12292       |
| 11            | C             | -0.37769         | 0.203808       |

|    |   |          |          |
|----|---|----------|----------|
| 12 | C | -1.11405 | 0.358855 |
| 14 | C | 0.266829 | -0.08092 |
| 15 | C | 0.037598 | 0.253399 |
| 17 | C | -0.14118 | -0.06559 |
| 19 | C | -0.16933 | -0.04464 |
| 21 | C | -0.40151 | -0.00682 |
| 24 | C | -0.35006 | -0.05877 |
| 26 | C | 0.33809  | 0.068368 |
| 27 | C | 0.19239  | 0.063088 |
| 29 | C | -0.35867 | 0.089383 |
| 31 | C | -0.4615  | -0.00537 |
| 34 | C | 0.451509 | 0.036643 |
| 36 | C | 0.542106 | 0.003768 |
| 39 | C | 0.53908  | 0.004207 |
| 42 | C | -0.44109 | -0.00842 |
| 45 | C | -0.43905 | -0.00832 |

**Table S18** Gas Phase Optimized Coordinates of **3** (Singlet Spin State)

| Center Number | Atomic Number | Coordinates(Angstroms) |          |          |
|---------------|---------------|------------------------|----------|----------|
|               |               | X                      | Y        | Z        |
| 1             | 23            | 0.6924                 | -1.16117 | 0.371921 |
| 2             | 8             | 2.442683               | -0.50379 | 0.611706 |
| 3             | 8             | 0.60032                | 0.042001 | 2.35245  |
| 4             | 1             | 1.532972               | 0.200867 | 2.574733 |
| 5             | 8             | -1.22483               | -0.82715 | 0.422624 |
| 6             | 7             | 0.407614               | 0.784992 | -0.53242 |
| 7             | 8             | 0.827115               | -1.89611 | -1.04218 |
| 8             | 6             | 0.349317               | -3.95628 | 1.277678 |
| 9             | 1             | -0.71415               | -4.15085 | 1.431014 |
| 10            | 1             | 0.926993               | -4.53243 | 2.001479 |
| 11            | 1             | 0.627219               | -4.24833 | 0.26216  |
| 12            | 7             | -0.94144               | 1.176289 | -0.69874 |
| 13            | 6             | 1.312765               | 1.583506 | -1.01458 |
| 14            | 1             | 0.968813               | 2.478415 | -1.52484 |
| 15            | 8             | 0.60801                | -2.5571  | 1.487184 |
| 16            | 6             | 3.25974                | 0.295391 | -0.12199 |
| 17            | 6             | -3.95843               | 3.599772 | 1.88698  |
| 18            | 1             | -3.48327               | 4.35486  | 1.255927 |
| 19            | 1             | -3.75079               | 3.857636 | 2.927791 |
| 20            | 1             | -5.03869               | 3.672977 | 1.735684 |
| 21            | 6             | 2.732082               | 1.345449 | -0.91835 |
| 22            | 6             | -3.69932               | -0.0347  | -1.70484 |

|    |   |          |          |          |
|----|---|----------|----------|----------|
| 23 | 1 | -4.78645 | 0.093739 | -1.74364 |
| 24 | 6 | 5.002166 | 1.999761 | -1.52617 |
| 25 | 1 | 5.675692 | 2.650927 | -2.06513 |
| 26 | 6 | -1.725   | 0.259594 | -0.18247 |
| 27 | 6 | 5.508316 | 0.951875 | -0.73975 |
| 28 | 1 | 6.576872 | 0.795765 | -0.67316 |
| 29 | 6 | -3.34575 | -1.4777  | -2.10326 |
| 30 | 1 | -3.75769 | -2.16714 | -1.35873 |
| 31 | 6 | -3.44237 | 2.193801 | 1.545065 |
| 32 | 1 | -2.36589 | 2.147676 | 1.733966 |
| 33 | 6 | -3.71675 | 1.796736 | 0.08529  |
| 34 | 1 | -4.7945  | 1.84354  | -0.10464 |
| 35 | 6 | 4.648265 | 0.109558 | -0.04267 |
| 36 | 1 | 5.02044  | -0.69865 | 0.569752 |
| 37 | 6 | 3.629923 | 2.19121  | -1.60649 |
| 38 | 1 | 3.22777  | 2.995389 | -2.21024 |
| 39 | 6 | -0.20583 | -0.36217 | 3.501002 |
| 40 | 1 | -0.21606 | 0.430415 | 4.250057 |
| 41 | 1 | 0.167885 | -1.29289 | 3.925892 |
| 42 | 1 | -1.2053  | -0.51913 | 3.112936 |
| 43 | 6 | -3.22509 | 0.378485 | -0.28421 |
| 44 | 6 | -3.8724  | -1.84965 | -3.49761 |
| 45 | 1 | -3.45124 | -1.19447 | -4.26441 |
| 46 | 1 | -4.96119 | -1.76211 | -3.54759 |
| 47 | 1 | -3.60871 | -2.87664 | -3.75829 |
| 48 | 1 | -2.26174 | -1.61607 | -2.07588 |
| 49 | 1 | -3.26989 | 0.664069 | -2.4293  |
| 50 | 1 | -3.23997 | 2.517519 | -0.58348 |
| 51 | 1 | -3.90927 | 1.460783 | 2.2128   |
| 52 | 1 | -3.63453 | -0.33865 | 0.432989 |

**Table S19** Gas Phase Optimized Coordinates of  $\mathbf{3}^-$  (Doublet Spin State)

| Center Number | Atomic Number | Coordinates(Angstroms) |          |          |
|---------------|---------------|------------------------|----------|----------|
|               |               | X                      | Y        | Z        |
| 1             | 23            | 0.560888               | -0.96539 | 0.09404  |
| 2             | 8             | 2.330661               | -0.10897 | 0.416994 |
| 3             | 8             | 4.291737               | -1.92125 | 1.184115 |
| 4             | 1             | 3.50041                | -1.33307 | 1.191369 |
| 5             | 8             | -1.41734               | -0.951   | 0.543426 |
| 6             | 7             | -0.06953               | 1.024892 | -0.27217 |
| 7             | 8             | 0.679266               | -1.73265 | -1.32563 |
| 8             | 6             | 0.109291               | -3.22983 | 1.924898 |

|    |   |          |          |          |
|----|---|----------|----------|----------|
| 9  | 1 | -0.95596 | -2.97278 | 1.948645 |
| 10 | 1 | 0.409454 | -3.5553  | 2.928595 |
| 11 | 1 | 0.233519 | -4.08378 | 1.242996 |
| 12 | 7 | -1.48117 | 1.222728 | -0.28623 |
| 13 | 6 | 0.65776  | 2.061005 | -0.58306 |
| 14 | 1 | 0.12771  | 2.973037 | -0.85143 |
| 15 | 8 | 0.914436 | -2.1196  | 1.522362 |
| 16 | 6 | 2.881495 | 0.993593 | -0.09878 |
| 17 | 6 | -4.71989 | 3.033943 | 2.417599 |
| 18 | 1 | -4.37431 | 3.873383 | 1.808458 |
| 19 | 1 | -4.52177 | 3.278458 | 3.464366 |
| 20 | 1 | -5.80443 | 2.957667 | 2.29224  |
| 21 | 6 | 2.096115 | 2.086922 | -0.58579 |
| 22 | 6 | -4.04878 | -0.38274 | -1.32555 |
| 23 | 1 | -5.14565 | -0.42123 | -1.33226 |
| 24 | 6 | 4.134534 | 3.346072 | -1.07857 |
| 25 | 1 | 4.617689 | 4.240668 | -1.44972 |
| 26 | 6 | -2.07824 | 0.121205 | 0.136948 |
| 27 | 6 | 4.902311 | 2.260359 | -0.60967 |
| 28 | 1 | 5.98425  | 2.321947 | -0.62384 |
| 29 | 6 | -3.49133 | -1.735   | -1.80458 |
| 30 | 1 | -3.79144 | -2.51661 | -1.09859 |
| 31 | 6 | -4.0182  | 1.731488 | 2.002807 |
| 32 | 1 | -2.94192 | 1.831665 | 2.161704 |
| 33 | 6 | -4.26966 | 1.357475 | 0.533102 |
| 34 | 1 | -5.35004 | 1.263882 | 0.364959 |
| 35 | 6 | 4.294247 | 1.111931 | -0.12928 |
| 36 | 1 | 4.864245 | 0.265125 | 0.227685 |
| 37 | 6 | 2.752933 | 3.248416 | -1.06057 |
| 38 | 1 | 2.145098 | 4.072462 | -1.41882 |
| 39 | 6 | 3.948471 | -3.13332 | 0.467824 |
| 40 | 1 | 3.345293 | -2.9235  | -0.41862 |
| 41 | 1 | 3.385168 | -3.82468 | 1.10155  |
| 42 | 1 | 4.883578 | -3.6083  | 0.166215 |
| 43 | 6 | -3.58951 | 0.042603 | 0.096843 |
| 44 | 6 | -3.97422 | -2.1017  | -3.21634 |
| 45 | 1 | -3.6537  | -1.35302 | -3.94616 |
| 46 | 1 | -5.06646 | -2.16452 | -3.26235 |
| 47 | 1 | -3.5692  | -3.06559 | -3.53301 |
| 48 | 1 | -2.40003 | -1.71906 | -1.78235 |
| 49 | 1 | -3.7537  | 0.403715 | -2.02824 |
| 50 | 1 | -3.90765 | 2.163639 | -0.1097  |
| 51 | 1 | -4.35446 | 0.912995 | 2.649453 |
| 52 | 1 | -3.86527 | -0.75334 | 0.795453 |

**Table S20** Gas Phase Spin densities of **3**-(Doublet Spin State)

| Center Number | Atomic Number | Mullikan Charges | Spin Densities |
|---------------|---------------|------------------|----------------|
| 1             | V             | 1.5843           | 1.09302        |
| 2             | O             | -0.74517         | 0.007158       |
| 3             | O             | -0.23448         | 0.001573       |
| 5             | O             | -0.64359         | -0.0006        |
| 6             | N             | -0.51953         | -0.010598      |
| 7             | O             | -0.60461         | -0.12895       |
| 8             | C             | 0.168503         | 0.009857       |
| 12            | N             | -0.27579         | 0.00136        |
| 13            | C             | 0.265188         | 0.008287       |
| 15            | O             | -0.7056          | 0.010039       |
| 16            | C             | 0.369201         | 0.00486        |
| 17            | C             | -0.03763         | -0.000001      |
| 21            | C             | -0.10351         | -0.003031      |
| 22            | C             | -0.00488         | 0.000271       |
| 24            | C             | -0.07304         | -0.002146      |
| 26            | C             | 0.456502         | 0.004824       |
| 27            | C             | 0.01326          | 0.003222       |
| 29            | C             | 0.037146         | -0.000077      |
| 31            | C             | 0.018431         | 0.000046       |
| 33            | C             | 0.012153         | -0.000106      |
| 35            | C             | -0.04605         | -0.002281      |
| 37            | C             | -0.00707         | 0.002945       |
| 39            | C             | 0.186024         | 0.000343       |
| 43            | C             | -0.07038         | -0.000009      |
| 44            | C             | -0.0394          | -0.000007      |

**Table S21.** Gas Phase Optimized Coordinates of **4** (Singlet Spin State)

| Center Number | Atomic Number | Coordinates (Angstroms) |          |          |
|---------------|---------------|-------------------------|----------|----------|
|               |               | X                       | Y        | Z        |
| 1             | 23            | -0.44104                | 1.636608 | 0.247857 |
| 2             | 8             | 1.329892                | 1.803294 | -0.39495 |
| 3             | 8             | -0.63876                | 1.588394 | -2.07177 |
| 4             | 1             | 0.237345                | 1.867455 | -2.38662 |
| 5             | 8             | -2.15398                | 0.734695 | 0.116813 |
| 6             | 7             | 0.025562                | -0.44653 | 0.007257 |
| 7             | 8             | -0.19197                | 1.619004 | 1.827209 |

|    |   |          |          |          |
|----|---|----------|----------|----------|
| 8  | 6 | -1.66529 | 4.240502 | 0.944142 |
| 9  | 1 | -2.74908 | 4.118775 | 0.999175 |
| 10 | 1 | -1.43613 | 5.241916 | 0.577622 |
| 11 | 1 | -1.23562 | 4.100754 | 1.939003 |
| 12 | 7 | -1.09309 | -1.31385 | -0.03252 |
| 13 | 6 | 1.198835 | -1.01414 | -0.03507 |
| 14 | 1 | 1.197611 | -2.09583 | -0.08027 |
| 15 | 8 | -1.12772 | 3.275237 | 0.02344  |
| 16 | 6 | 2.467521 | 1.091886 | -0.22215 |
| 17 | 6 | -3.81483 | -2.92768 | -3.46481 |
| 18 | 1 | -3.02657 | -3.67939 | -3.37662 |
| 19 | 1 | -3.77498 | -2.52132 | -4.47779 |
| 20 | 1 | -4.77459 | -3.43815 | -3.34872 |
| 21 | 6 | 2.449408 | -0.30259 | -0.03582 |
| 22 | 6 | -3.78978 | -1.85308 | 1.53517  |
| 23 | 1 | -4.76916 | -2.34392 | 1.529741 |
| 24 | 6 | 4.934328 | -0.27263 | 0.017702 |
| 25 | 6 | -2.19243 | -0.60567 | 0.052205 |
| 26 | 6 | 4.886087 | 1.13891  | -0.18218 |
| 27 | 1 | 5.819083 | 1.685758 | -0.23792 |
| 28 | 6 | -3.74993 | -0.81485 | 2.669141 |
| 29 | 1 | -4.48405 | -0.02859 | 2.46381  |
| 30 | 6 | -3.64191 | -1.82306 | -2.41142 |
| 31 | 1 | -2.68513 | -1.31691 | -2.56979 |
| 32 | 6 | -3.69796 | -2.36037 | -0.97165 |
| 33 | 1 | -4.65644 | -2.86611 | -0.81258 |
| 34 | 6 | 3.69415  | 1.802851 | -0.29714 |
| 35 | 1 | 3.644969 | 2.871605 | -0.44454 |
| 36 | 6 | 3.707178 | -1.01168 | 0.09648  |
| 37 | 6 | -1.73693 | 2.229341 | -2.79047 |
| 38 | 1 | -1.70389 | 1.957965 | -3.84628 |
| 39 | 1 | -1.69953 | 3.310607 | -2.66568 |
| 40 | 1 | -2.64369 | 1.846713 | -2.33724 |
| 41 | 6 | -3.54335 | -1.27256 | 0.115693 |
| 42 | 6 | -4.03081 | -1.43549 | 4.04598  |
| 43 | 1 | -3.28939 | -2.20026 | 4.290993 |
| 44 | 1 | -5.01675 | -1.90739 | 4.075272 |
| 45 | 1 | -3.99988 | -0.67978 | 4.833444 |
| 46 | 1 | -2.77473 | -0.32087 | 2.686121 |
| 47 | 1 | -3.04439 | -2.63207 | 1.723014 |
| 48 | 1 | -2.91257 | -3.10745 | -0.83192 |
| 49 | 1 | -4.42267 | -1.06564 | -2.54524 |
| 50 | 1 | -4.27835 | -0.48266 | -0.06297 |
| 51 | 6 | 3.797283 | -2.41378 | 0.316093 |

|    |   |          |          |          |
|----|---|----------|----------|----------|
| 52 | 6 | 6.174757 | -0.95077 | 0.144438 |
| 53 | 6 | 5.019748 | -3.04589 | 0.434594 |
| 54 | 6 | 6.223841 | -2.31329 | 0.346668 |
| 55 | 1 | 2.900078 | -3.00802 | 0.404746 |
| 56 | 1 | 5.053758 | -4.11431 | 0.601674 |
| 57 | 1 | 7.174129 | -2.82043 | 0.442706 |
| 58 | 1 | 7.088208 | -0.37239 | 0.081398 |

**Table S22.** Gas Phase Optimized Coordinates of 4<sup>-</sup>(Doublet Spin State)

| Center Number | Atomic Number | Coordinates(Angstroms) |          |          |
|---------------|---------------|------------------------|----------|----------|
|               |               | X                      | Y        | Z        |
| 1             | 23            | -0.55422               | 1.445065 | 0.685001 |
| 2             | 8             | 1.349565               | 1.750742 | 0.229037 |
| 3             | 8             | 0.319395               | 4.361984 | -2.00824 |
| 4             | 1             | -0.02505               | 3.967692 | -1.15445 |
| 5             | 8             | -2.28329               | 0.675137 | -0.01172 |
| 6             | 7             | -0.07426               | -0.53047 | 0.138901 |
| 7             | 8             | -0.68992               | 1.48729  | 2.291486 |
| 8             | 6             | -2.28802               | 3.730682 | -0.07101 |
| 9             | 1             | -3.05737               | 2.988406 | -0.30021 |
| 10            | 1             | -2.31258               | 4.516896 | -0.83187 |
| 11            | 1             | -2.51663               | 4.178353 | 0.904121 |
| 12            | 7             | -1.19571               | -1.37714 | -0.11542 |
| 13            | 6             | 1.095759               | -1.11258 | 0.071436 |
| 14            | 1             | 1.073167               | -2.17577 | -0.14085 |
| 15            | 8             | -0.97746               | 3.138357 | -0.06716 |
| 16            | 6             | 2.416197               | 0.972674 | 0.249359 |
| 17            | 6             | -3.32502               | -3.43408 | -3.59621 |
| 18            | 1             | -2.57192               | -4.15966 | -3.27763 |
| 19            | 1             | -3.10885               | -3.16331 | -4.63282 |
| 20            | 1             | -4.29752               | -3.93551 | -3.57784 |
| 21            | 6             | 2.358816               | -0.44867 | 0.210714 |
| 22            | 6             | -4.14582               | -1.73018 | 1.146245 |
| 23            | 1             | -5.11513               | -2.23121 | 1.027174 |
| 24            | 6             | 4.849801               | -0.52587 | 0.267881 |
| 25            | 6             | -2.29396               | -0.64539 | -0.14717 |
| 26            | 6             | 4.856796               | 0.905206 | 0.274532 |
| 27            | 1             | 5.813521               | 1.415277 | 0.28887  |
| 28            | 6             | -4.29682               | -0.56692 | 2.142216 |
| 29            | 1             | -4.9879                | 0.174068 | 1.726616 |
| 30            | 6             | -3.31766               | -2.20027 | -2.68037 |
| 31            | 1             | -2.34232               | -1.71139 | -2.7364  |



|    |   |          |          |          |
|----|---|----------|----------|----------|
| 32 | 6 | -3.61655 | -2.54603 | -1.21247 |
| 33 | 1 | -4.59025 | -3.04815 | -1.1524  |
| 34 | 6 | 3.696254 | 1.621158 | 0.267617 |
| 35 | 1 | 3.683026 | 2.701584 | 0.275144 |
| 36 | 6 | 3.590685 | -1.21471 | 0.241238 |
| 37 | 6 | 0.564972 | 3.28289  | -2.9287  |
| 38 | 1 | -0.23127 | 2.528946 | -2.90003 |
| 39 | 1 | 1.513886 | 2.771012 | -2.72465 |
| 40 | 1 | 0.610968 | 3.700462 | -3.93724 |
| 41 | 6 | -3.63933 | -1.32645 | -0.26767 |
| 42 | 6 | -4.8048  | -1.03414 | 3.51497  |
| 43 | 1 | -4.1108  | -1.74863 | 3.966282 |
| 44 | 1 | -5.78117 | -1.52338 | 3.435922 |
| 45 | 1 | -4.9061  | -0.19253 | 4.203977 |
| 46 | 1 | -3.34316 | -0.04969 | 2.260491 |
| 47 | 1 | -3.45305 | -2.47323 | 1.555797 |
| 48 | 1 | -2.86416 | -3.25093 | -0.85023 |
| 49 | 1 | -4.05402 | -1.47288 | -3.0407  |
| 50 | 1 | -4.3227  | -0.5721  | -0.67006 |
| 51 | 6 | 3.631515 | -2.63767 | 0.259994 |
| 52 | 6 | 6.059083 | -1.26328 | 0.292521 |
| 53 | 6 | 4.827606 | -3.33158 | 0.284108 |
| 54 | 6 | 6.059877 | -2.6446  | 0.297245 |
| 55 | 1 | 2.710293 | -3.20143 | 0.270015 |
| 56 | 1 | 4.815287 | -4.41454 | 0.299387 |
| 57 | 1 | 6.991465 | -3.19561 | 0.317421 |
| 58 | 1 | 6.994466 | -0.7153  | 0.310669 |

**Table S23.** Gas Phase Spin densities of 4<sup>-</sup>(Doublet Spin State)

| Center Number | Atomic Number | Mullikan Charges | Spin Densities |
|---------------|---------------|------------------|----------------|
| 1             | V             | 1.605001         | 1.101839       |
| 2             | O             | -0.6758          | 0.010501       |
| 3             | O             | -0.23919         | 0.002259       |
| 5             | O             | -0.64888         | -0.00087       |
| 6             | N             | -0.53962         | -0.01175       |
| 7             | O             | -0.5909          | -0.13141       |
| 8             | C             | 0.193685         | 0.009036       |
| 12            | N             | -0.26672         | 0.001143       |
| 13            | C             | 0.290113         | 0.007666       |
| 15            | O             | -0.76223         | 0.00235        |
| 16            | C             | 0.351942         | 0.004982       |

|    |   |          |          |
|----|---|----------|----------|
| 17 | C | -0.03633 | -1E-06   |
| 21 | C | -0.10157 | -0.00313 |
| 22 | C | -0.00424 | 0.000285 |
| 24 | C | -0.09242 | -0.00145 |
| 25 | C | 0.453853 | 0.005107 |
| 26 | C | 0.058793 | 0.002955 |
| 28 | C | 0.034309 | -1.8E-05 |
| 30 | C | 0.017397 | 0.000039 |
| 32 | C | 0.013647 | -9.7E-05 |
| 34 | C | -0.04756 | -0.00124 |
| 36 | C | 0.000972 | 0.001625 |
| 37 | C | 0.152924 | 0.000129 |
| 41 | C | -0.06986 | -0.0001  |
| 42 | C | -0.03828 | -1.4E-05 |
| 51 | C | 0.035558 | -0.00081 |
| 52 | C | -0.03446 | 0.000892 |
| 53 | C | -0.03377 | 0.000904 |
| 54 | C | -0.02636 | -0.00083 |

**Table S24.** Gas Phase Optimized Coordinates of **5** (Singlet Spin State)

| Center Number | Atomic Number | Coordinates(Angstroms) |          |          |
|---------------|---------------|------------------------|----------|----------|
|               |               | X                      | Y        | Z        |
| 1             | 23            | 1.143792               | -1.29563 | -1.22146 |
| 2             | 23            | -1.32922               | 0.849546 | -1.57892 |
| 3             | 8             | -0.10558               | -1.46995 | 0.243223 |
| 4             | 8             | -0.10343               | -0.35138 | -2.09792 |
| 5             | 8             | 1.230857               | -2.74796 | -1.86264 |
| 6             | 8             | -2.83628               | -0.19739 | -1.5193  |
| 7             | 8             | 2.677364               | -0.42432 | -1.72356 |
| 8             | 8             | -1.57819               | 1.88693  | -2.75743 |
| 9             | 8             | 0.027891               | 1.690694 | -0.4902  |
| 10            | 7             | -2.37019               | 1.894844 | -0.0429  |
| 11            | 7             | 1.585498               | -2.15696 | 1.64582  |
| 12            | 7             | 2.314253               | -1.71169 | 0.509644 |
| 13            | 6             | -4.15563               | -0.04367 | -1.26555 |
| 14            | 6             | -4.5924                | 0.994811 | -0.40393 |
| 15            | 7             | -1.58209               | 2.790742 | 0.731734 |
| 16            | 6             | 5.908097               | -1.30856 | -0.21053 |
| 17            | 6             | 4.011995               | -0.56778 | -1.55055 |
| 18            | 6             | -5.0827                | -0.93424 | -1.82502 |
| 19            | 6             | 4.508703               | -1.20498 | -0.38465 |
| 20            | 6             | -5.97378               | 1.112688 | -0.12606 |

|    |   |          |          |          |
|----|---|----------|----------|----------|
| 21 | 6 | 3.61367  | -1.6911  | 0.627627 |
| 22 | 1 | 4.026174 | -2.04861 | 1.56575  |
| 23 | 6 | -6.88807 | 0.236466 | -0.68932 |
| 24 | 6 | 0.306013 | -2.0122  | 1.404521 |
| 25 | 6 | -6.4354  | -0.78932 | -1.53928 |
| 26 | 6 | -0.74494 | -2.44799 | 2.384049 |
| 27 | 1 | -0.21907 | -2.92074 | 3.217397 |
| 28 | 6 | -3.64926 | 1.879516 | 0.218679 |
| 29 | 1 | -4.00267 | 2.574185 | 0.974026 |
| 30 | 6 | 6.780997 | -0.80571 | -1.16268 |
| 31 | 6 | 4.898203 | -0.0515  | -2.50605 |
| 32 | 6 | 6.269165 | -0.17484 | -2.31123 |
| 33 | 6 | -0.32293 | 2.628487 | 0.405687 |
| 34 | 6 | -1.96511 | -5.78644 | 0.639031 |
| 35 | 1 | -2.66873 | -6.1198  | 1.406737 |
| 36 | 1 | -1.44006 | -6.66679 | 0.263338 |
| 37 | 1 | -2.54618 | -5.36917 | -0.18695 |
| 38 | 6 | -1.68769 | -3.48916 | 1.725845 |
| 39 | 1 | -2.22473 | -3.00284 | 0.907072 |
| 40 | 1 | -2.4338  | -3.77771 | 2.473465 |
| 41 | 6 | -0.98042 | -4.74897 | 1.198746 |
| 42 | 1 | -0.27035 | -4.46977 | 0.415233 |
| 43 | 1 | -0.39075 | -5.19931 | 2.004522 |
| 44 | 6 | 0.765689 | 3.479147 | 0.99274  |
| 45 | 1 | 0.282172 | 4.156008 | 1.702044 |
| 46 | 6 | -1.54193 | -1.22926 | 2.918122 |
| 47 | 1 | -1.91141 | -0.65379 | 2.064632 |
| 48 | 1 | -2.42168 | -1.60714 | 3.448721 |
| 49 | 6 | -0.73789 | -0.31836 | 3.860371 |
| 50 | 1 | 0.175159 | 0.014526 | 3.35761  |
| 51 | 1 | -0.40976 | -0.90264 | 4.726811 |
| 52 | 6 | 1.780901 | 2.588189 | 1.756791 |
| 53 | 1 | 2.256113 | 1.909713 | 1.042609 |
| 54 | 6 | 3.753412 | 2.446849 | 3.374642 |
| 55 | 1 | 4.507842 | 3.018504 | 3.918944 |
| 56 | 1 | 4.27518  | 1.727923 | 2.73801  |
| 57 | 1 | 3.17103  | 1.880975 | 4.105834 |
| 58 | 6 | -1.53736 | 0.904696 | 4.334386 |
| 59 | 1 | -1.81295 | 1.545077 | 3.493282 |
| 60 | 1 | -0.95688 | 1.509222 | 5.034741 |
| 61 | 1 | -2.45652 | 0.601485 | 4.843051 |
| 62 | 6 | 1.436247 | 4.320181 | -0.12777 |
| 63 | 1 | 1.950309 | 3.636455 | -0.80806 |
| 64 | 1 | 2.200165 | 4.949793 | 0.332972 |
| 65 | 6 | 0.460005 | 5.203505 | -0.91873 |

|    |   |          |          |          |
|----|---|----------|----------|----------|
| 66 | 1 | -0.26209 | 4.604715 | -1.47619 |
| 67 | 1 | 0.999761 | 5.821192 | -1.63906 |
| 68 | 1 | -0.09824 | 5.870266 | -0.25705 |
| 69 | 6 | 2.851343 | 3.368515 | 2.538907 |
| 70 | 1 | 3.473186 | 3.946775 | 1.850855 |
| 71 | 1 | 4.48776  | 0.432929 | -3.37918 |
| 72 | 1 | 6.948819 | 0.220812 | -3.05383 |
| 73 | 1 | 7.848799 | -0.89595 | -1.02398 |
| 74 | 1 | 6.289988 | -1.79293 | 0.679315 |
| 75 | 1 | -7.14714 | -1.47601 | -1.97728 |
| 76 | 1 | -7.94251 | 0.338362 | -0.47635 |
| 77 | 1 | -6.30923 | 1.903448 | 0.53309  |
| 78 | 1 | -4.7175  | -1.71743 | -2.47209 |
| 79 | 1 | 1.226597 | 1.958815 | 2.460675 |
| 80 | 1 | 2.360908 | 4.093839 | 3.197623 |

**Table S25.** Gas Phase Optimized Coordinates of  $5^-$  (Doublet Spin State)

| Center Number | Atomic Number | Coordinates(Angstroms) |          |          |
|---------------|---------------|------------------------|----------|----------|
|               |               | X                      | Y        | Z        |
| 1             | 23            | -1.3918                | 1.421612 | -0.90481 |
| 2             | 23            | 1.212312               | -0.43876 | -1.77708 |
| 3             | 8             | -0.10707               | 1.071392 | 0.49751  |
| 4             | 8             | -0.19736               | 0.532473 | -2.01742 |
| 5             | 8             | -1.28755               | 2.972523 | -1.20915 |
| 6             | 8             | 2.538514               | 0.87789  | -1.58008 |
| 7             | 8             | -2.98313               | 0.850429 | -1.51769 |
| 8             | 8             | 1.607772               | -1.13834 | -3.14021 |
| 9             | 8             | 0.141182               | -1.89721 | -0.951   |
| 10            | 7             | 2.52391                | -1.51212 | -0.43443 |
| 11            | 7             | -1.67276               | 1.703758 | 2.059843 |
| 12            | 7             | -2.46395               | 1.58732  | 0.887998 |
| 13            | 6             | 3.81759                | 0.976474 | -1.27143 |
| 14            | 6             | 4.491178               | -0.09741 | -0.56418 |
| 15            | 7             | 2.034304               | -2.6615  | 0.109234 |
| 16            | 6             | -6.09558               | 1.716452 | 0.228051 |
| 17            | 6             | -4.30937               | 1.080541 | -1.29762 |
| 18            | 6             | 4.527783               | 2.149834 | -1.60517 |
| 19            | 6             | -4.71638               | 1.508417 | -0.00897 |
| 20            | 6             | 5.874044               | 0.062335 | -0.23955 |
| 21            | 6             | -3.76046               | 1.677232 | 1.044986 |
| 22            | 1             | -4.11428               | 1.872693 | 2.051569 |
| 23            | 6             | 6.545743               | 1.206726 | -0.58951 |

|    |   |          |          |          |
|----|---|----------|----------|----------|
| 24 | 6 | -0.42791 | 1.443153 | 1.767786 |
| 25 | 6 | 5.862655 | 2.25564  | -1.27627 |
| 26 | 6 | 0.670376 | 1.583626 | 2.780146 |
| 27 | 1 | 0.195853 | 1.954927 | 3.691277 |
| 28 | 6 | 3.811066 | -1.25483 | -0.15882 |
| 29 | 1 | 4.327816 | -2.0001  | 0.435234 |
| 30 | 6 | -7.02203 | 1.513756 | -0.78277 |
| 31 | 6 | -5.24155 | 0.866345 | -2.31391 |
| 32 | 6 | -6.59154 | 1.087264 | -2.05175 |
| 33 | 6 | 0.711802 | -2.81304 | -0.22992 |
| 34 | 6 | 2.217187 | 5.067461 | 1.702989 |
| 35 | 1 | 2.941943 | 5.170198 | 2.514369 |
| 36 | 1 | 1.782242 | 6.051085 | 1.520799 |
| 37 | 1 | 2.763276 | 4.775766 | 0.801749 |
| 38 | 6 | 1.70861  | 2.634453 | 2.302791 |
| 39 | 1 | 2.186588 | 2.267987 | 1.388963 |
| 40 | 1 | 2.487163 | 2.695179 | 3.069451 |
| 41 | 6 | 1.132132 | 4.038462 | 2.052391 |
| 42 | 1 | 0.399624 | 3.998516 | 1.241    |
| 43 | 1 | 0.588173 | 4.369601 | 2.94253  |
| 44 | 6 | -0.03985 | -4.01901 | 0.210578 |
| 45 | 1 | 0.631867 | -4.59702 | 0.848042 |
| 46 | 6 | 1.343248 | 0.22478  | 3.097134 |
| 47 | 1 | 1.708178 | -0.21813 | 2.164805 |
| 48 | 1 | 2.224349 | 0.427679 | 3.713406 |
| 49 | 6 | 0.43786  | -0.77669 | 3.833074 |
| 50 | 1 | -0.44677 | -0.99204 | 3.224592 |
| 51 | 1 | 0.06415  | -0.31268 | 4.750712 |
| 52 | 6 | -1.29404 | -3.59421 | 1.034817 |
| 53 | 1 | -1.98199 | -3.06162 | 0.372678 |
| 54 | 6 | -3.18797 | -4.29743 | 2.590598 |
| 55 | 1 | -3.68428 | -5.1441  | 3.066394 |
| 56 | 1 | -3.93425 | -3.76833 | 1.993488 |
| 57 | 1 | -2.85091 | -3.62286 | 3.381156 |
| 58 | 6 | 1.161859 | -2.08613 | 4.180169 |
| 59 | 1 | 1.535381 | -2.5863  | 3.282099 |
| 60 | 1 | 0.498519 | -2.78054 | 4.698462 |
| 61 | 1 | 2.017391 | -1.90055 | 4.833774 |
| 62 | 6 | -0.41544 | -4.8791  | -1.03834 |
| 63 | 1 | -1.11169 | -4.30324 | -1.65252 |
| 64 | 1 | -0.95413 | -5.75417 | -0.67502 |
| 65 | 6 | 0.787585 | -5.33106 | -1.87766 |
| 66 | 1 | 1.302049 | -4.48771 | -2.34468 |
| 67 | 1 | 0.461395 | -5.99279 | -2.68035 |

|    |   |          |          |          |
|----|---|----------|----------|----------|
| 68 | 1 | 1.514215 | -5.87721 | -1.27255 |
| 69 | 6 | -2.01288 | -4.76925 | 1.719623 |
| 70 | 1 | -2.38335 | -5.47259 | 0.970771 |
| 71 | 1 | -4.89693 | 0.536708 | -3.28211 |
| 72 | 1 | -7.31623 | 0.928048 | -2.8378  |
| 73 | 1 | -8.0725  | 1.682256 | -0.59768 |
| 74 | 1 | -6.41785 | 2.042984 | 1.208011 |
| 75 | 1 | 6.407149 | 3.150201 | -1.54411 |
| 76 | 1 | 7.59165  | 1.322334 | -0.3482  |
| 77 | 1 | 6.38155  | -0.73586 | 0.28449  |
| 78 | 1 | 4.000059 | 2.933942 | -2.1253  |
| 79 | 1 | -0.98306 | -2.88162 | 1.80506  |
| 80 | 1 | -1.29785 | -5.32041 | 2.338935 |

**Table S26.** Gas Phase Spin densities of  $5^-$  (Doublet Spin State)

| Center Number | Atomic Number | Mullikan Charges | Spin Densities |
|---------------|---------------|------------------|----------------|
| 1             | V             | 1.655296         | 0.00107        |
| 2             | V             | 1.650205         | -0.02134       |
| 3             | O             | -0.71216         | 0.001737       |
| 4             | O             | -0.70408         | -5.2E-05       |
| 5             | O             | -0.38835         | -0.00031       |
| 6             | O             | -0.66649         | 0.076734       |
| 7             | O             | -0.70189         | 0.000117       |
| 8             | O             | -0.37042         | 0.036327       |
| 9             | O             | -0.56499         | 0.106222       |
| 10            | N             | -0.51226         | 0.153782       |
| 11            | N             | -0.2061          | 0.00238        |
| 12            | N             | -0.54039         | 0.000451       |
| 13            | C             | 0.446185         | 0.109614       |
| 14            | C             | -0.13031         | 0.151978       |
| 15            | N             | -0.1842          | 0.309909       |
| 16            | C             | 0.096181         | -0.0001        |
| 17            | C             | 0.408409         | 0.000505       |
| 18            | C             | 0.04372          | -0.03545       |
| 19            | C             | -0.15926         | 0.000489       |
| 20            | C             | 0.129779         | -0.06672       |
| 21            | C             | 0.407392         | 0.000009       |
| 23            | C             | 0.042852         | 0.091379       |
| 24            | C             | 0.508913         | -0.00042       |
| 25            | C             | 0.139418         | 0.069416       |

|    |   |          |          |
|----|---|----------|----------|
| 26 | C | -0.05279 | 0.00007  |
| 28 | C | 0.399991 | -0.04777 |
| 30 | C | 0.015633 | 0.000175 |
| 31 | C | 0.027666 | -0.00028 |
| 32 | C | 0.093051 | 0.000533 |
| 33 | C | 0.541176 | 0.044906 |
| 34 | C | 0.013226 | -1.6E-05 |
| 38 | C | 0.027642 | -0.00051 |
| 41 | C | 0.023184 | 0.000027 |
| 44 | C | -0.06909 | -0.00569 |
| 46 | C | 0.014601 | -0.00054 |
| 49 | C | 0.01802  | -5.5E-05 |
| 52 | C | 0.077319 | 0.008273 |
| 54 | C | 0.032185 | 0.001228 |
| 58 | C | 0.011427 | 0.000699 |
| 62 | C | 0.072422 | 0.010261 |
| 65 | C | 0.050304 | 0.000696 |
| 69 | C | 0.016578 | 0.000249 |

**Table S27.** Gas Phase Optimized Coordinates of **6** (Singlet Spin State)

| Center Number | Atomic Number | Coordinates(Angstroms) |          |          |
|---------------|---------------|------------------------|----------|----------|
|               |               | X                      | Y        | Z        |
| 1             | 23            | 8.366421               | 5.358141 | 12.80011 |
| 2             | 23            | 7.7261                 | 8.451827 | 13.78142 |
| 3             | 8             | 7.15325                | 6.187602 | 11.55374 |
| 4             | 8             | 8.707302               | 6.982653 | 13.4805  |
| 5             | 8             | 9.613361               | 4.890391 | 11.93102 |
| 6             | 8             | 8.19506                | 9.473107 | 12.32132 |
| 7             | 8             | 8.392222               | 4.328637 | 14.32629 |
| 8             | 8             | 8.305768               | 9.223953 | 15.04456 |
| 9             | 8             | 6.333643               | 7.32593  | 14.49906 |
| 10            | 7             | 5.931461               | 9.540486 | 13.54149 |
| 11            | 7             | 6.195415               | 4.148485 | 11.09154 |
| 12            | 7             | 7.026531               | 3.836332 | 12.20282 |
| 13            | 6             | 7.938039               | 10.69985 | 11.83049 |
| 14            | 6             | 6.730991               | 11.3559  | 12.13536 |
| 15            | 7             | 4.787733               | 9.002096 | 14.19792 |
| 16            | 6             | 7.507816               | 0.732539 | 14.22628 |
| 17            | 6             | 8.301752               | 3.024893 | 14.65417 |
| 18            | 6             | 6.853324               | -0.26079 | 13.45101 |

|    |   |          |          |          |
|----|---|----------|----------|----------|
| 19 | 1 | 6.396433 | -0.00087 | 12.50739 |
| 20 | 6 | 8.897895 | 11.28464 | 10.96595 |
| 21 | 1 | 9.798482 | 10.72637 | 10.76008 |
| 22 | 6 | 7.594741 | 2.126335 | 13.83373 |
| 23 | 6 | 6.483247 | 12.67226 | 11.5784  |
| 24 | 6 | 6.916348 | 2.618625 | 12.67405 |
| 25 | 1 | 6.228393 | 1.976468 | 12.13929 |
| 26 | 6 | 7.468422 | 13.24946 | 10.71163 |
| 27 | 6 | 7.397794 | -1.97215 | 15.08577 |
| 28 | 1 | 7.347962 | -3.0049  | 15.40206 |
| 29 | 6 | 6.346874 | 5.415104 | 10.79861 |
| 30 | 6 | 8.663115 | 12.52084 | 10.42601 |
| 31 | 1 | 9.395913 | 12.97019 | 9.7678   |
| 32 | 6 | 5.668962 | 6.052831 | 9.621246 |
| 33 | 1 | 5.115704 | 5.259303 | 9.112494 |
| 34 | 6 | 5.746655 | 10.68218 | 12.92438 |
| 35 | 1 | 4.752776 | 11.10093 | 13.01518 |
| 36 | 6 | 8.123716 | 0.323267 | 15.45437 |
| 37 | 6 | 5.317406 | 13.43406 | 11.85464 |
| 38 | 1 | 4.559932 | 13.04748 | 12.52061 |
| 39 | 6 | 6.797925 | -1.57628 | 13.87092 |
| 40 | 1 | 6.29297  | -2.31105 | 13.25831 |
| 41 | 6 | 8.899337 | 2.60243  | 15.86845 |
| 42 | 1 | 9.416589 | 3.341932 | 16.46065 |
| 43 | 6 | 8.808121 | 1.290851 | 16.25118 |
| 44 | 1 | 9.265806 | 0.965729 | 17.17688 |
| 45 | 6 | 8.050169 | -1.03484 | 15.85845 |
| 46 | 1 | 8.521204 | -1.32374 | 16.78957 |
| 47 | 6 | 5.105616 | 7.835865 | 14.69806 |
| 48 | 6 | 8.711282 | 6.204162 | 7.089569 |
| 49 | 1 | 8.175601 | 6.594694 | 6.220026 |
| 50 | 1 | 9.424393 | 5.457775 | 6.734157 |
| 51 | 1 | 9.282429 | 7.027133 | 7.526152 |
| 52 | 6 | 6.729688 | 6.631112 | 8.647388 |
| 53 | 1 | 7.263669 | 7.438732 | 9.155494 |
| 54 | 1 | 6.193603 | 7.080632 | 7.805152 |
| 55 | 6 | 7.741208 | 5.601431 | 8.116714 |
| 56 | 1 | 8.314215 | 5.187059 | 8.950969 |
| 57 | 1 | 7.202397 | 4.761727 | 7.664666 |
| 58 | 6 | 7.24714  | 14.53542 | 10.15458 |
| 59 | 1 | 8.003127 | 14.95352 | 9.501878 |
| 60 | 6 | 6.098481 | 15.24422 | 10.43647 |
| 61 | 1 | 5.939397 | 16.22391 | 10.00753 |
| 62 | 6 | 5.129506 | 14.68444 | 11.29669 |
| 63 | 1 | 4.231111 | 15.2415  | 11.52634 |



|    |   |          |          |          |
|----|---|----------|----------|----------|
| 64 | 6 | 4.142571 | 7.032342 | 15.52731 |
| 65 | 1 | 3.203271 | 7.588205 | 15.55123 |
| 66 | 6 | 4.671641 | 7.149661 | 10.07592 |
| 67 | 1 | 5.198372 | 7.85127  | 10.72896 |
| 68 | 1 | 4.365595 | 7.713297 | 9.18857  |
| 69 | 6 | 3.419535 | 6.608691 | 10.78559 |
| 70 | 1 | 3.712939 | 6.029236 | 11.66544 |
| 71 | 1 | 2.90498  | 5.91093  | 10.11559 |
| 72 | 6 | 3.91378  | 5.668727 | 14.90659 |
| 73 | 1 | 4.815327 | 5.097943 | 14.7028  |
| 74 | 6 | 2.46837  | 3.787029 | 14.05406 |
| 75 | 1 | 1.923804 | 3.849517 | 13.10724 |
| 76 | 1 | 1.86316  | 3.172082 | 14.72722 |
| 77 | 1 | 3.404997 | 3.260027 | 13.86699 |
| 78 | 6 | 2.451505 | 7.721944 | 11.21363 |
| 79 | 1 | 2.918603 | 8.38858  | 11.94185 |
| 80 | 1 | 1.553635 | 7.306602 | 11.6763  |
| 81 | 1 | 2.135566 | 8.32274  | 10.35614 |
| 82 | 6 | 4.683601 | 6.893398 | 16.98389 |
| 83 | 1 | 5.604511 | 6.306644 | 16.95314 |
| 84 | 1 | 3.949179 | 6.308228 | 17.54268 |
| 85 | 6 | 4.940321 | 8.233443 | 17.68661 |
| 86 | 1 | 5.732493 | 8.79945  | 17.19358 |
| 87 | 1 | 5.248504 | 8.069535 | 18.72099 |
| 88 | 1 | 4.042197 | 8.855606 | 17.69866 |
| 89 | 6 | 2.712503 | 5.152982 | 14.63342 |
| 90 | 1 | 1.825535 | 5.749336 | 14.8385  |

**Table S28.** Gas Phase Optimized Coordinates of  $6^-$ (Doublet Spin State)

| Center Number | Atomic Number | Coordinates(Angstroms) |          |          |
|---------------|---------------|------------------------|----------|----------|
|               |               | X                      | Y        | Z        |
| 1             | 23            | 8.48569                | 5.340046 | 12.74593 |
| 2             | 23            | 7.816821               | 8.393829 | 13.9277  |
| 3             | 8             | 7.178162               | 6.348568 | 11.62085 |
| 4             | 8             | 8.793564               | 7.021803 | 13.69913 |
| 5             | 8             | 9.788816               | 4.990968 | 11.87869 |
| 6             | 8             | 8.378855               | 9.422634 | 12.42233 |
| 7             | 8             | 8.569587               | 4.276755 | 14.39089 |
| 8             | 8             | 8.358894               | 9.252647 | 15.17111 |
| 9             | 8             | 6.381726               | 7.304059 | 14.71246 |
| 10            | 7             | 5.978196               | 9.420229 | 13.48715 |
| 11            | 7             | 6.233869               | 4.288184 | 11.10416 |

|    |   |          |          |          |
|----|---|----------|----------|----------|
| 12 | 7 | 7.085813 | 3.908355 | 12.18763 |
| 13 | 6 | 8.05903  | 10.58162 | 11.85843 |
| 14 | 6 | 6.792756 | 11.18569 | 12.02686 |
| 15 | 7 | 4.811923 | 8.892944 | 14.11841 |
| 16 | 6 | 7.45042  | 0.739767 | 14.11693 |
| 17 | 6 | 8.372916 | 2.987604 | 14.62287 |
| 18 | 6 | 6.746424 | -0.19259 | 13.30434 |
| 19 | 1 | 6.310669 | 0.129353 | 12.37002 |
| 20 | 6 | 9.039487 | 11.1944  | 11.01943 |
| 21 | 1 | 9.983062 | 10.67943 | 10.91483 |
| 22 | 6 | 7.605675 | 2.14199  | 13.77552 |
| 23 | 6 | 6.513114 | 12.44776 | 11.3708  |
| 24 | 6 | 6.927624 | 2.690447 | 12.6382  |
| 25 | 1 | 6.189929 | 2.093833 | 12.11369 |
| 26 | 6 | 7.521472 | 13.04235 | 10.54124 |
| 27 | 6 | 7.188626 | -1.99933 | 14.86568 |
| 28 | 1 | 7.082562 | -3.04043 | 15.1419  |
| 29 | 6 | 6.379096 | 5.579445 | 10.87863 |
| 30 | 6 | 8.777493 | 12.37631 | 10.38753 |
| 31 | 1 | 9.528835 | 12.83315 | 9.754177 |
| 32 | 6 | 5.658892 | 6.224079 | 9.722278 |
| 33 | 1 | 5.153115 | 5.421782 | 9.177547 |
| 34 | 6 | 5.787207 | 10.51238 | 12.79371 |
| 35 | 1 | 4.773921 | 10.89557 | 12.79977 |
| 36 | 6 | 8.039931 | 0.239819 | 15.32546 |
| 37 | 6 | 5.283833 | 13.15011 | 11.50862 |
| 38 | 1 | 4.502285 | 12.75072 | 12.13804 |
| 39 | 6 | 6.616276 | -1.52035 | 13.6684  |
| 40 | 1 | 6.073916 | -2.19941 | 13.02235 |
| 41 | 6 | 8.939431 | 2.449642 | 15.82444 |
| 42 | 1 | 9.497723 | 3.138983 | 16.44117 |
| 43 | 6 | 8.777934 | 1.137553 | 16.16013 |
| 44 | 1 | 9.215751 | 0.749563 | 17.07279 |
| 45 | 6 | 7.890476 | -1.12569 | 15.67265 |
| 46 | 1 | 8.345081 | -1.47509 | 16.59261 |
| 47 | 6 | 5.146229 | 7.791978 | 14.75308 |
| 48 | 6 | 8.732259 | 6.665532 | 7.266775 |
| 49 | 1 | 8.190335 | 7.03342  | 6.389747 |
| 50 | 1 | 9.512798 | 5.98519  | 6.917743 |
| 51 | 1 | 9.223897 | 7.520629 | 7.737265 |
| 52 | 6 | 6.687151 | 6.905217 | 8.78361  |
| 53 | 1 | 7.152299 | 7.730479 | 9.328888 |
| 54 | 1 | 6.139432 | 7.340102 | 7.938972 |
| 55 | 6 | 7.786492 | 5.967742 | 8.256162 |

|    |   |          |          |          |
|----|---|----------|----------|----------|
| 56 | 1 | 8.367813 | 5.584976 | 9.098456 |
| 57 | 1 | 7.325864 | 5.097919 | 7.774135 |
| 58 | 6 | 7.262809 | 14.27512 | 9.890924 |
| 59 | 1 | 8.04071  | 14.70187 | 9.268587 |
| 60 | 6 | 6.054344 | 14.92487 | 10.04107 |
| 61 | 1 | 5.869098 | 15.8656  | 9.539222 |
| 62 | 6 | 5.059926 | 14.35123 | 10.86199 |
| 63 | 1 | 4.111608 | 14.85751 | 10.99078 |
| 64 | 6 | 4.137859 | 7.040245 | 15.58442 |
| 65 | 1 | 3.186484 | 7.569841 | 15.49969 |
| 66 | 6 | 4.600753 | 7.24232  | 10.21547 |
| 67 | 1 | 5.083697 | 7.931703 | 10.91279 |
| 68 | 1 | 4.270748 | 7.83816  | 9.356191 |
| 69 | 6 | 3.373805 | 6.599846 | 10.8833  |
| 70 | 1 | 3.697519 | 5.978597 | 11.72225 |
| 71 | 1 | 2.891464 | 5.922875 | 10.16799 |
| 72 | 6 | 3.987219 | 5.623179 | 15.0709  |
| 73 | 1 | 4.921543 | 5.086592 | 14.9332  |
| 74 | 6 | 2.664888 | 3.617626 | 14.30743 |
| 75 | 1 | 2.172819 | 3.588934 | 13.33009 |
| 76 | 1 | 2.051346 | 3.020968 | 14.99096 |
| 77 | 1 | 3.632665 | 3.124908 | 14.20668 |
| 78 | 6 | 2.357402 | 7.637906 | 11.38345 |
| 79 | 1 | 2.802367 | 8.274205 | 12.15123 |
| 80 | 1 | 1.479702 | 7.153678 | 11.81988 |
| 81 | 1 | 2.012196 | 8.279193 | 10.56609 |
| 82 | 6 | 4.58803  | 7.037799 | 17.07689 |
| 83 | 1 | 5.510537 | 6.458245 | 17.15109 |
| 84 | 1 | 3.82289  | 6.503936 | 17.6479  |
| 85 | 6 | 4.810743 | 8.439719 | 17.66178 |
| 86 | 1 | 5.634047 | 8.949417 | 17.15926 |
| 87 | 1 | 5.05875  | 8.377788 | 18.72419 |
| 88 | 1 | 3.917693 | 9.061933 | 17.55866 |
| 89 | 6 | 2.821188 | 5.031527 | 14.79857 |
| 90 | 1 | 1.900182 | 5.598279 | 14.92673 |

Table S29. Gas Phase Spin densities of 6<sup>-</sup> (Doublet Spin State)

| Center Number | Atomic Number | Mullikan Charges | Spin Densities |
|---------------|---------------|------------------|----------------|
| 1             | V             | 1.599661         | 1.09091        |
| 2             | V             | 1.641567         | 0.061517       |
| 3             | O             | -0.68698         | -0.002026      |
| 4             | O             | -0.72349         | -0.032805      |
| 5             | O             | -0.54898         | -0.137836      |
| 6             | O             | -0.69063         | 0.00183        |
| 7             | O             | -0.67905         | 0.012562       |
| 8             | O             | -0.51191         | 0.005418       |
| 9             | O             | -0.64715         | -0.00087       |
| 10            | N             | -0.53448         | -0.000945      |
| 11            | N             | -0.26008         | 0.001063       |
| 12            | N             | -0.55022         | -0.014231      |
| 13            | C             | 0.38886          | 0.000112       |
| 14            | C             | -0.1253          | 0              |
| 15            | N             | -0.26397         | -0.000233      |
| 16            | C             | 0.003073         | 0.001786       |
| 17            | C             | 0.356235         | 0.004923       |
| 18            | C             | 0.0409           | -0.000882      |
| 20            | C             | -0.03814         | -0.000023      |
| 22            | C             | -0.1114          | -0.003489      |
| 23            | C             | 0.005904         | 0.000065       |
| 24            | C             | 0.314429         | 0.007647       |
| 26            | C             | -0.08683         | -0.000082      |
| 27            | C             | -0.01991         | -0.000886      |
| 29            | C             | 0.466245         | 0.004071       |
| 30            | C             | 0.071947         | 0.000149       |
| 32            | C             | -0.07919         | -0.00058       |
| 34            | C             | 0.33139          | -0.00017       |
| 36            | C             | -0.09207         | -0.001377      |
| 37            | C             | 0.054244         | -0.00002       |
| 39            | C             | -0.02891         | 0.000883       |
| 41            | C             | -0.04841         | -0.000912      |
| 43            | C             | 0.066239         | 0.002356       |
| 45            | C             | -0.02986         | 0.00083        |
| 47            | C             | 0.494142         | 0.000412       |
| 48            | C             | -0.0319          | 0.000009       |
| 52            | C             | 0.024515         | 0.000438       |
| 55            | C             | 0.017952         | -0.000079      |
| 58            | C             | -0.02814         | 0.000055       |
| 60            | C             | -0.01166         | -0.000042      |

|    |   |          |           |
|----|---|----------|-----------|
| 62 | C | -0.02825 | 0.000038  |
| 64 | C | -0.1752  | -0.000129 |
| 66 | C | 0.025189 | 0.000483  |
| 69 | C | 0.015151 | 0.000034  |
| 72 | C | 0.117435 | 0.00005   |
| 74 | C | -0.05239 | -0.000002 |
| 78 | C | -0.0318  | -0.000004 |
| 82 | C | 0.040502 | 0.000022  |
| 85 | C | 0.001202 | -0.000032 |
| 89 | C | 0.039511 | -0.000008 |
